# Supplementary material for: A male-biased sex-distorter gene drive for the human malaria vector Anopheles gambiae
Source: PubMed Central journal article supplement (PMC7473848; doi:10.1038/s41587-020-0508-1), 2020-05-11
Supplement: 41587_2020_508_MOESM1_ESM.pdf [file 41587_2020_508_MOESM1_ESM.pdf]

In the format provided by the authors and unedited.

# A male-biased sex-distorter gene drive for the human malaria vector *Anopheles gambiae*

In the format provided by the authors and unedited

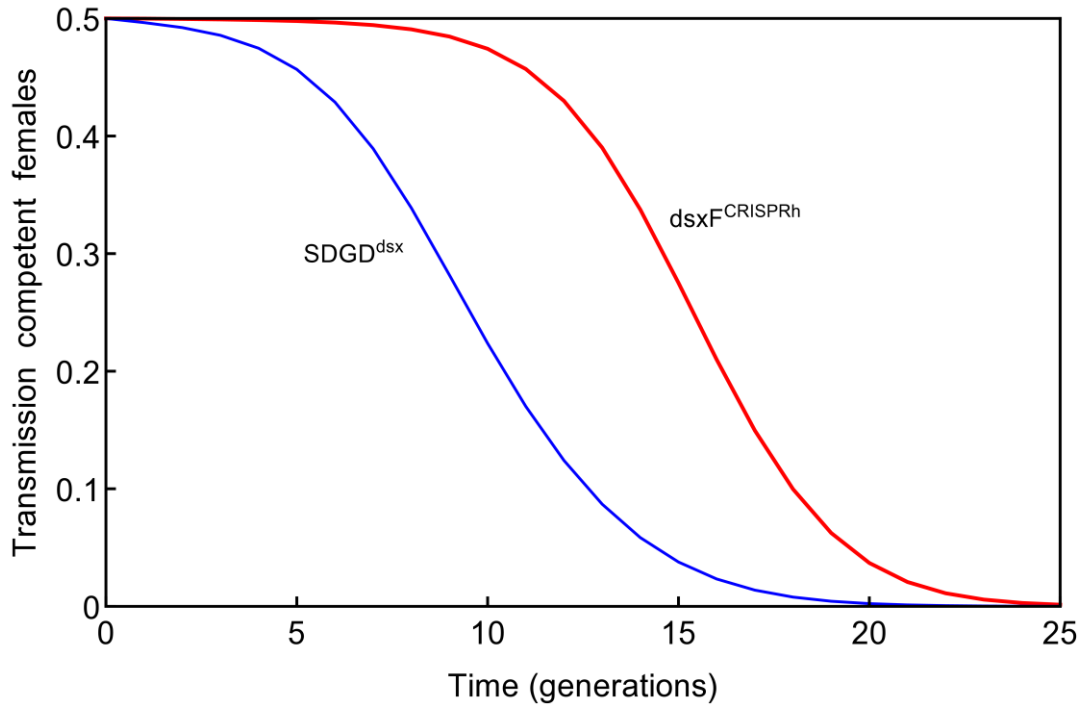

### Supplementary Figure 1

Model prediction of the reduction in abundance of transmission competent females.

Model prediction of the reduction over time in abundance of transmission competent (i.e. biting) females, normalised by the initial total population size, for the SDGD<sup>dsx</sup> construct compared to dsxF<sup>CRISPRh</sup> (Kyrou et al., 2018), using a continuous-time population dynamics model (see Supp. Modelling Methods) for 'field' release of 1% heterozygous transgenic males in the male population. The SDGD<sup>dsx</sup> construct is predicted to suppress the population of transmission competent females faster than the dsxF<sup>CRISPRh</sup> mainly due to the creation of a male bias in the population by the sex distorter. Parameters used for SDGD<sup>dsx</sup> are in Table S2; dsxF<sup>CRISPRh</sup> parameters were estimated from Kyrou et al. (2018) using an average W/D female fitness of 0.4335; for both,  $R_m$  (intrinsic growth rate per generation) = 6. At long times (not shown), the SDGD<sup>dsx</sup> population rebounds to an intermediate equilibrium (suppressed) population.

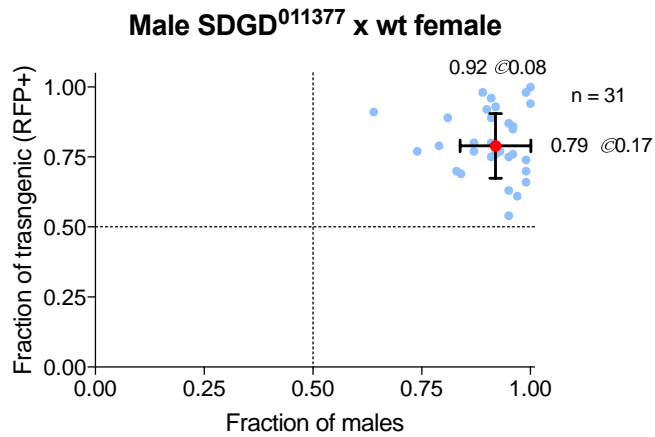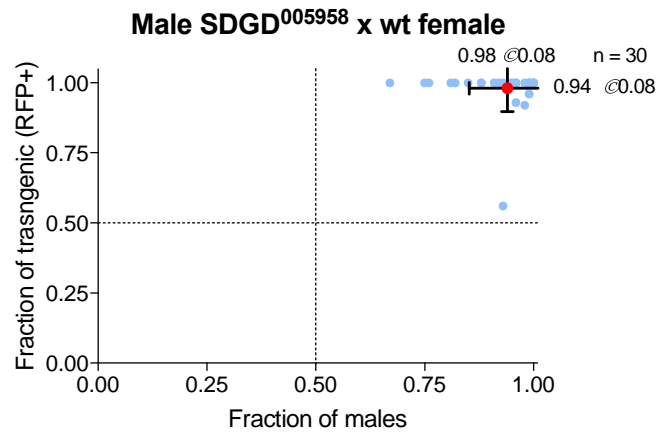

### Supplementary Figure 2

Sex and inheritance bias caused by SDGD<sup>011377</sup> and SDGD<sup>005958</sup> males.

Scattered plots showing the fraction of transgene inheritance (y-axis) against male bias (x-axis) in the progeny of heterozygous male SDGD<sup>011377</sup> (left-hand panel) SDGD<sup>005958</sup> and (right-hand panel) crossed to wild type females. Individual coloured dots represent the progeny derived from a single female and the red dots indicate the average of the population (with respective values indicated next to the plot  $\pm$  s.e.m.). Error bars indicate standard deviation. SDGD at both loci showed a high transmission rate of the transgene determined by scoring in the progeny the presence of RFP marker that is linked to the SDGD allele. The progeny of SDGD/+ at both loci showed a strong sex ratio distortion towards males. Dotted lines indicate expected Mendelian inheritance.

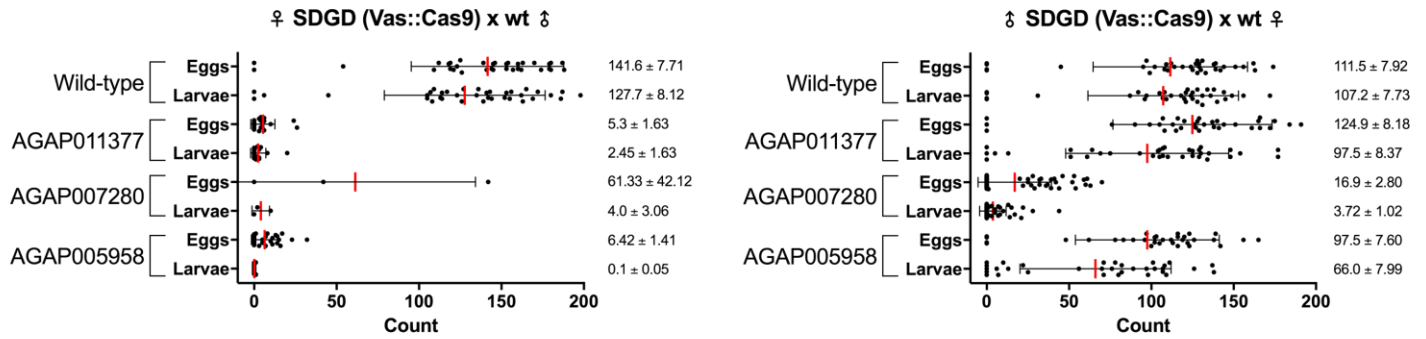

### Supplementary Figure 3

Fecundity phenotype of SDGD targeting 3 different fertility loci in *An. gambiae*

SDGD constructs expressing the Cas9 nuclease under the control of the *Vas2* promoter were generated targeting the fertility loci *AGAP011377*, *AGAP007280* and *AGAP005859* (as indicated). SDGD heterozygous male and female were crossed to wild-type counterparts. Each dot represents progeny of individual females. Fecundity was measured by counting the number of eggs per female and the hatched larvae. Values on the right represent average  $\pm$  s.e.m. A strong fertility effect was observed in heterozygous SDGD females at 3 loci, while male fecundity was strongly impaired by targeting 7280 and 5859 loci. Vertical red bars indicate average count, and error bars indicate standard deviation. A minimum of 20 females were analysed for each cross.

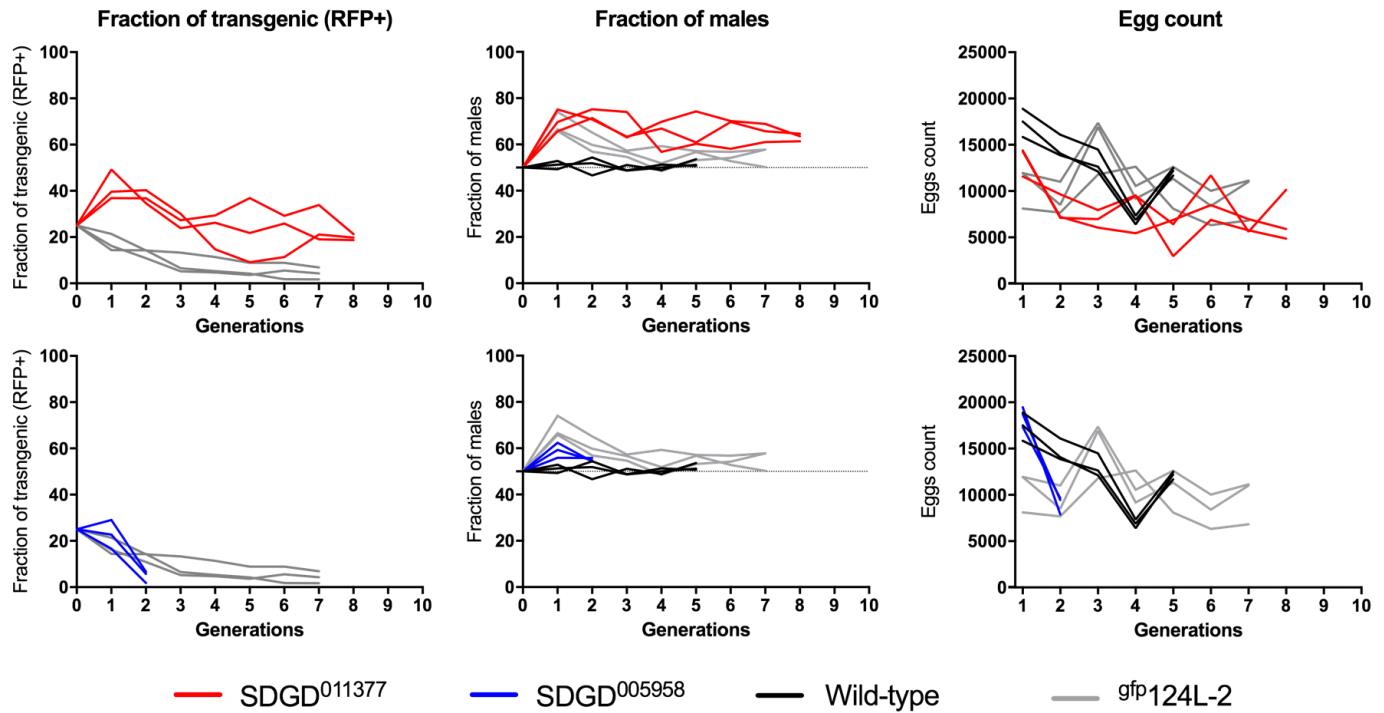

#### Supplementary Figure 4

Kinetics of SDGD<sup>011377</sup> and SDGD<sup>005958</sup> spread in target mosquito populations.

In these experiments 100 heterozygous transgenic males were introduced into a population of 100 wild-type males and 200 wild-type females (transgenic allele frequency of 12.5%). The frequency of the transgene was monitored every generation together with the fraction of males in the population and the total number of eggs laid. Each consecutive generation was established by collecting 450 eggs. The frequency of the SDGD<sup>011377</sup> (red lines) and SDGD<sup>005958</sup> (blue lines) was compared to that of the autosomal self-limiting sex-distorter *gfp124L-2* (grey lines) (Galizi et al., 2014) as well as to that of wild-type populations (black lines) as control. Each genotype was tested in triplicate cages. The SDGD<sup>005958</sup> allele disappeared from the populations at generation 2 due to the strong fertility effects. The SDGD<sup>011377</sup> alleles persisted in the populations despite the fertility effects but failed to increase over the frequency of release on subsequent generations. The fraction of males in the population was stably biased to about 65%.

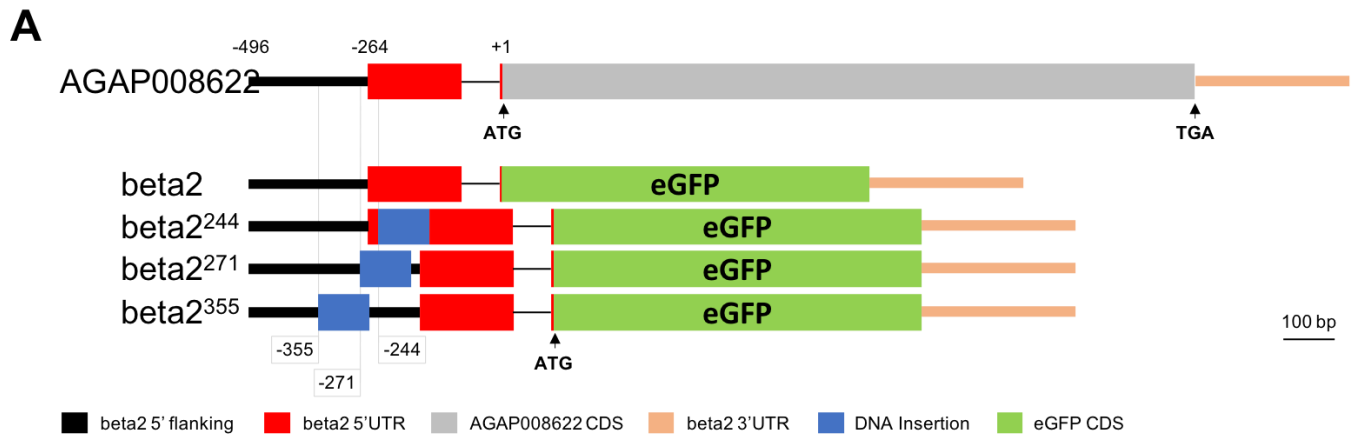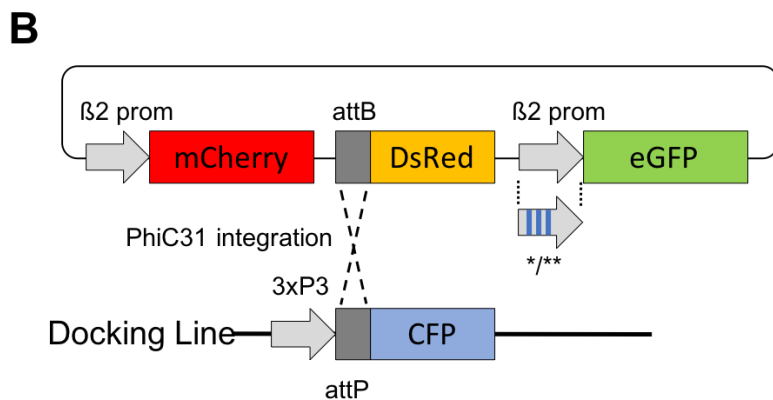

**C**

**DNA spacer**

```
GACTCGGACCCGAGTTGGCCAACGACCCACGGGCGGAG
TTAGGGCGGATGGTGAGAAGTGCGCGTCTCGTTCCCGC
AGCTCGCCAGCACTCTCAGACTCA
```

### Supplementary Figure 5

Mutagenesis of the *beta2* tubulin promoter.

A) Schematic overview of the *AGAP008622* (*beta2-tubulin*) locus and the three *beta2* promoter variants generated by placing a 100bp GC-rich DNA sequence (blue rectangle) upstream of the start codon at position 244, 271 and 355. B) The double-fluorescence reporter assay developed to detect the effects of the *beta2* promoter modifications on its transcription level. A construct for each modification was generated harbouring the modified *beta2* promoter (stars key) driving an eGFP marker, while a second, unmodified, *beta2* promoter was driving a mCherry protein. The constructs were integrated within the same autosomal docking line by PhiC31-mediated integration by replacing a 3xP3::CFP cassette with a 3xP3::DsRed as integration marker. C) The sequence of 100bp GC-rich DNA region inserted at the 5' of the *beta2* promoter.

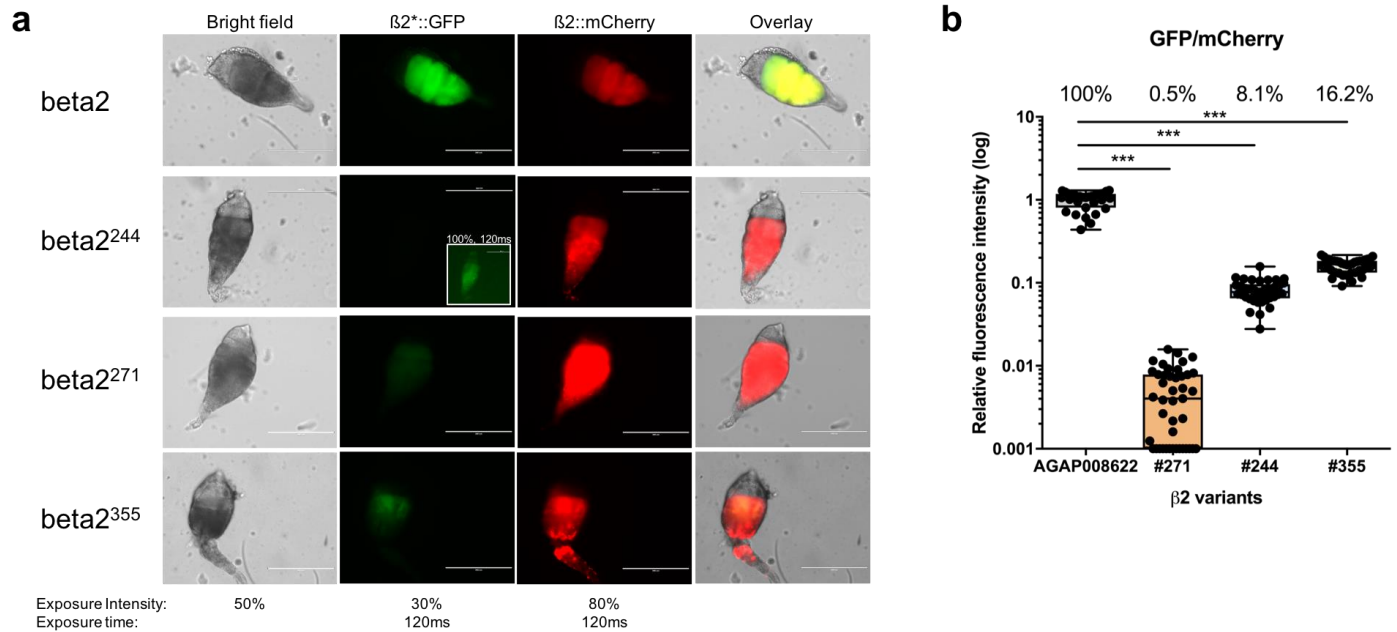

### Supplementary Figure 6

GFP and mCherry signal quantification from mosquito testes transformed with modified *beta2* promoters.

a) Dissected testis from  $\beta 2^{wt}$ ,  $\beta 2^{271}$ ,  $\beta 2^{244}$  and  $\beta 2^{355}$  transgenic lines containing a single heterozygous insertion were microphotographed under the same exposure settings (as indicated), using mCherry as internal control. Line  $\beta 2^{271}$  showed GFP fluorescence intensity comparable to background; GFP expression was detectable at increased exposure (100% gain, 120ms, inset). Scale bar, 200  $\mu m$ . b) Quantification of fluorescence intensity as GFP/mCherry ratio, normalized to the  $\beta 2^{wt}$  control (100%). Average relative intensity is indicated above the bars. \*\*\* indicates P value < 0.001 (ordinary One-way ANOVA). A minimum of 31 testes were analysed from individual expressing each promoter variant.

## SDGD<sup>dsx</sup> x wt

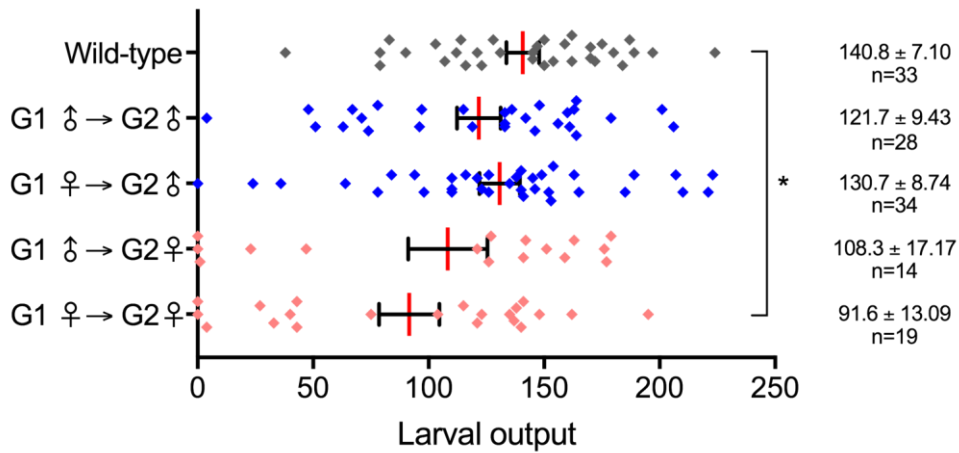

### Supplementary Figure 7

Maternal or paternal contribution to the fecundity of the SDGD<sup>dsx</sup> allele

Male and female SDGD<sup>dsx</sup> heterozygotes that had inherited a maternal or paternal copy of the SDGD<sup>dsx</sup> allele were crossed to wild type counterparts and assessed for fecundity. The total larval output is plotted for individual females (dots). Red bars indicate the average and the mean count (± s.e.m.) is shown. Females inheriting the transgene from the mother (G1♀ → G2♀) have significantly lower larval progeny (\*  $P = 0.0256$ , Kruskal-Wallis test) compared to wild-type control.



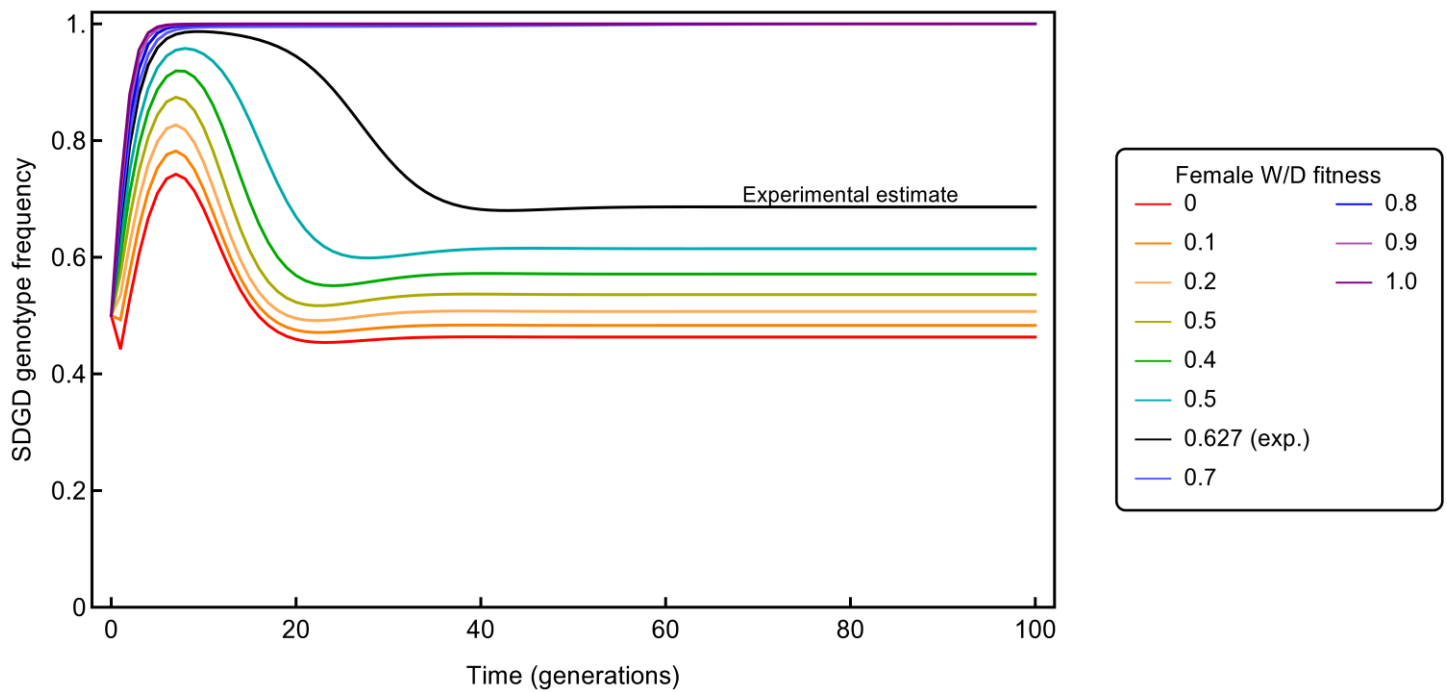

**Supplementary Figure 8**

Time dynamics of the frequency of  $SDGD^{dsx}$  as function of female fitness

Time dynamics of the frequency of  $SDGD^{dsx}$  transgenic individuals in the population as a function of W/D (where D represent the SDGD allele and W the wild-type allele) female fitness ( $w_{WD,xx}$ ), as predicted by the deterministic discrete-generation model at 25% initial allelic frequency. The graph shows the frequency of SDGD heterozygote males and females as a proportion of the male (or female) population, with other parameter estimates and baseline values given in Supp Table 2 (SDGD male fitness = 0.854;  $m$  (sex distortion) = 0.93). The predicted outcome at high W/D female fitness is elimination of the population, and at lower fitness, an intermediate equilibrium with W, R and D alleles. The result (black line) for the experimental estimate for female SDGD heterozygote fitness,  $w_{WD,xx} = 0.627$ , is in a parameter region where even a small (positive) change leads to a prediction of population elimination instead of suppression.

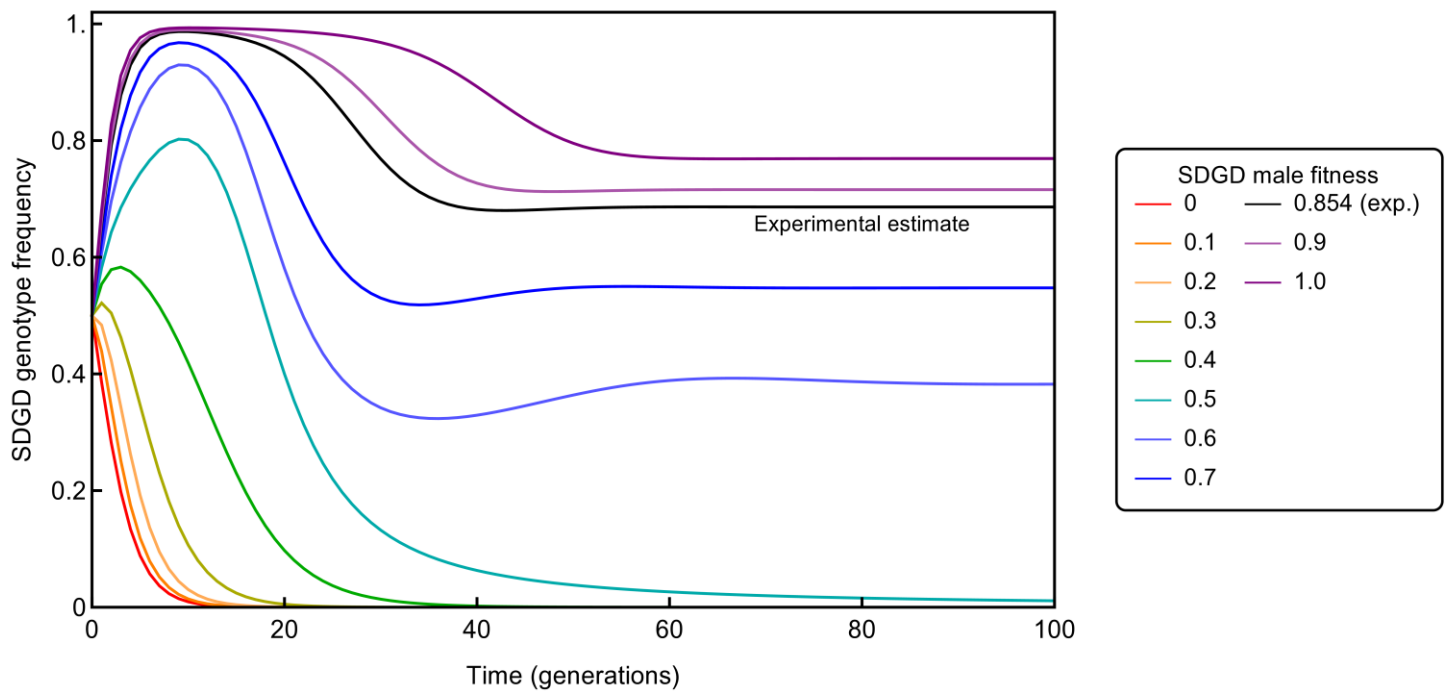

**Supplementary Figure 9**

Time dynamics of the frequency of  $SDGD^{dsx}$  as function of male fitness

Time dynamics of the frequency of  $SDGD^{dsx}$  transgenic individuals in the population as a function of the fitness of SDGD males (assume  $w_{WD,XY} = w_{DR,XY} = w_{DD,XY}$ ) as predicted by the deterministic discrete-generation model. Initial release is 50% of SDGD heterozygote males and females as a proportion of the male (or female) population, with other parameter estimates and baseline values given in Supp Table 2 (W/D female fitness  $w_{WD,XX} = 0.627$ ;  $m = 0.93$ ). For low SDGD male fitness ( $< \approx 0.5$ ), the construct is eventually lost.

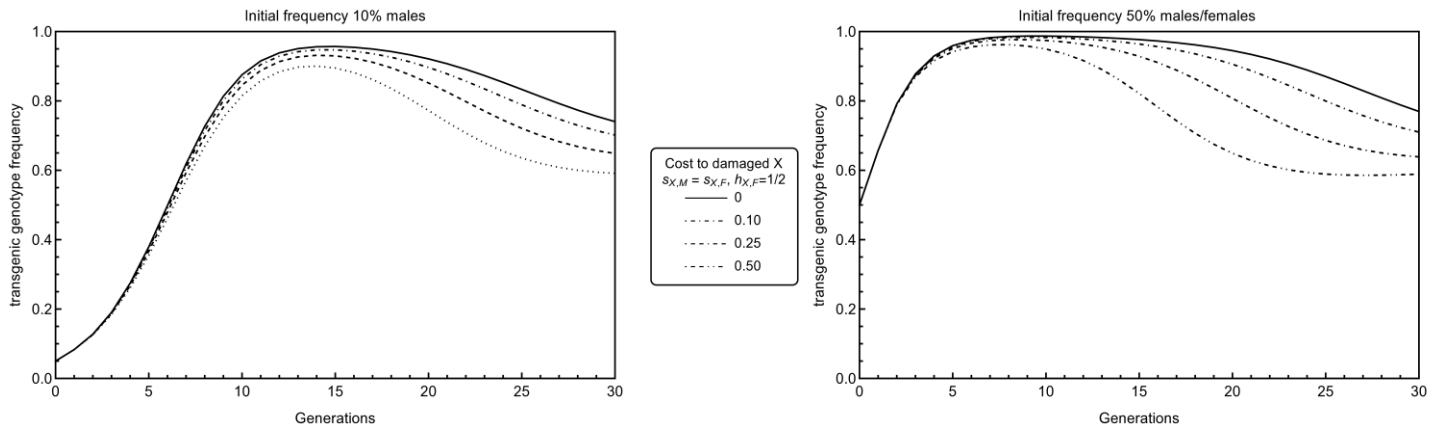

### Supplementary Figure 10

Impact of fitness due to damaged X chromosome.

Modelling the impact of fitness reduction, due to the inheritance of damaged X chromosomes passed through X-shredding in a SDGD male, on the spread of the SDGD transgenics as predicted by the deterministic discrete-generation cage model. For simplicity, we assume that the additional cost to carrying one damaged X chromosome in males is the same as the cost in females that carry two copies of the damaged X ( $s_{X,f} = s_{X,m}$ ), and females with one damaged X and one wildtype X chromosome have only half the fitness cost of females with two copies (dominance coefficient  $h_{X,f} = 1/2$ ). Estimates used for other parameters given in Supplementary Table 2.

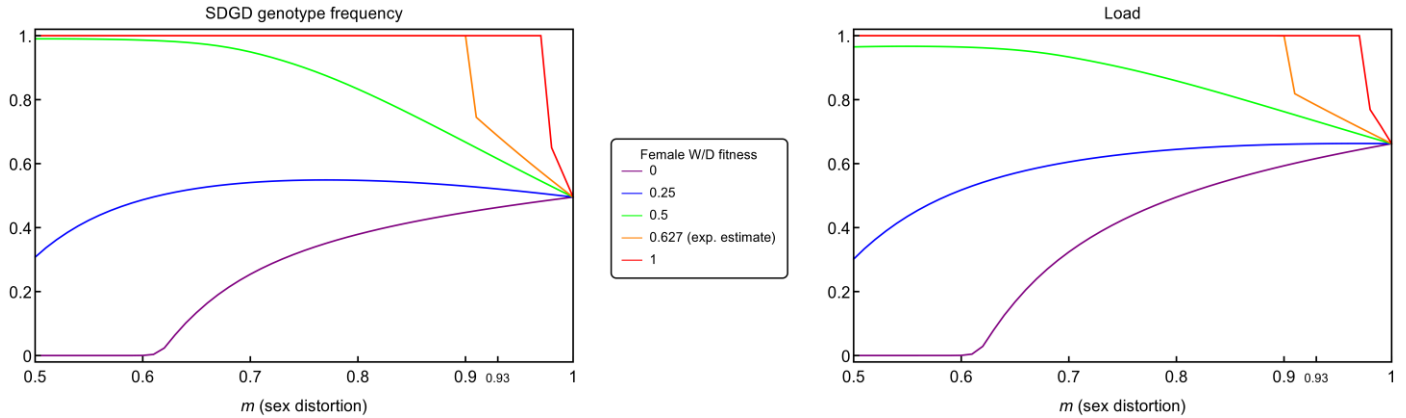

**Supplementary Figure 11**

Effect of female fitness on SDGD frequency and population load.

Effect of female W/D heterozygote fitness (D refers to the  $\text{SDGD}^{\text{dsx}}$  allele) on the SDGD genotype frequency (i.e., individuals with at least one copy of the SDGD) and load after 200 generations, as predicted by the deterministic discrete-generation model. Parameter estimates and baseline values given in Supp Table 2 (SDGD male fitness = 0.854). The possible outcomes (load = 1 and population elimination; intermediate equilibrium with W, D and R; or load = 0 and construct lost) depend upon the sex distortion  $m$  (0.5 [no sex bias] to 1 [only male progeny]) and the female W/D heterozygote fitness ( $0 \leq w_{\text{WD},\text{xx}} \leq 1$ ). For low female fitness, adding an X-shredder (increasing sex distortion  $m$ ) is predicted to beneficially increase the load on the population. For complete female heterozygous sterility (purple line), the drive construct disappears from the population if there is no sex distortion ( $m = 1/2$ ), whereas sufficiently increasing the sex distortion allows the  $\text{SDGD}^{\text{dsx}}$  to spread and impose a load on the population. The presence of the X-shredder keeps the construct predominantly in males, therefore mitigating the heterozygous female sterility effect. By contrast if female fitness is sufficiently high (lines of fitness 0.5 or greater on plot), the load decreases at high sex distortion because due to male bias,  $\text{SDGD}^{\text{dsx}}$  males replace high-fitness W/D heterozygote females which decreases the ability of the construct to spread. For a complete male sex bias,  $m = 1$ , no W/D heterozygote females are created (and therefore no female/male  $\text{SDGD}^{\text{dsx}}$  homozygotes), since all X chromosomes are shredded and  $\text{SDGD}^{\text{dsx}}$  males have no female progeny; thus the load at  $m = 1$  does not depend on the fitness of female W/D heterozygote individuals since none are present. Only  $\text{SDGD}^{\text{dsx}}$  heterozygous males can pass on the construct, with the  $\text{SDGD}^{\text{dsx}}$  allele present in reduced frequency in an intermediate equilibrium with wildtype and resistance alleles and a load less than one for these parameters. (In general, the amount of reduction in  $\text{SDGD}^{\text{dsx}}$  frequency and load at  $m = 1$  will depend on parameters such as the homing rate, here less than 100%, the rate of resistant R mutation, and the relative fertility of the R and  $\text{SDGD}^{\text{dsx}}$  allele).

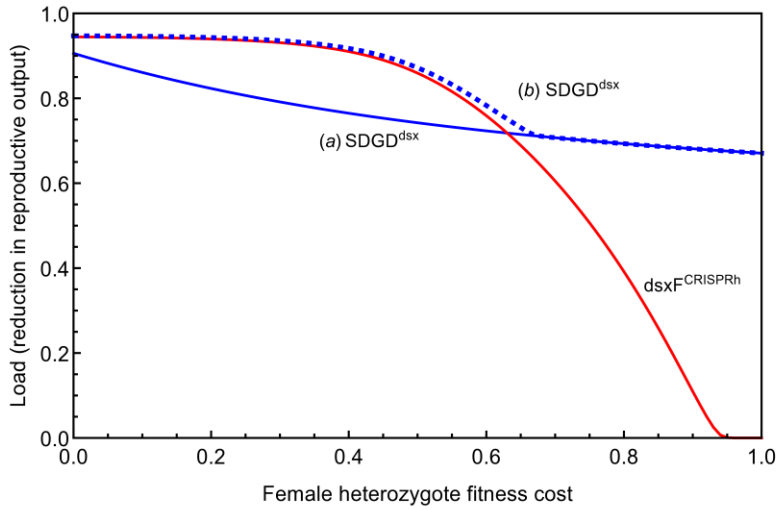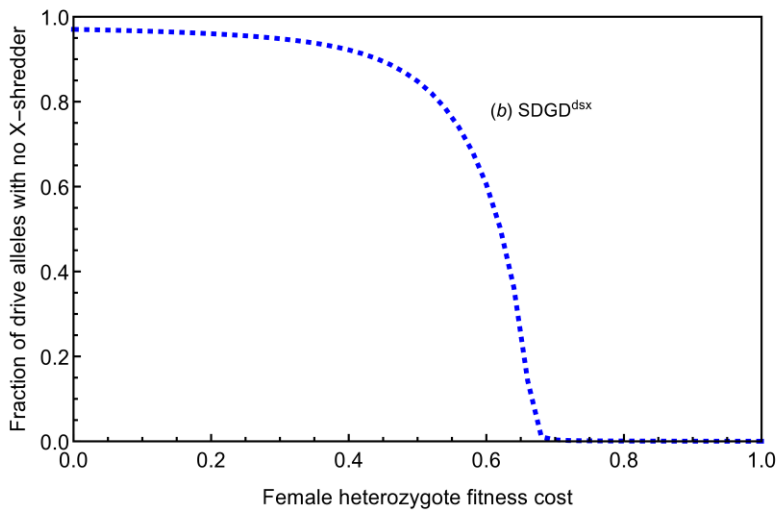

### Supplementary Figure 12

Comparison of the predicted equilibrium for release of SDGD<sup>dsx</sup> or dsxF<sup>CRISPRh</sup> into a wild-type population

(Top panel) Comparison of the predicted equilibrium load (i.e., the reduction in reproductive output by the population after 400 generations) for release of SDGD<sup>dsx</sup> or dsxF<sup>CRISPRh</sup> into a wild-type population, varying the fitness cost to heterozygote W/D females. The discrete generation model predicts that the SDGD<sup>dsx</sup> construct (blue solid line) is more robust to reductions in female heterozygote fitness compared to dsxF<sup>CRISPRh</sup> (red line), still maintaining a substantial load even at 100% reduction in female heterozygote fitness (i.e. females heterozygous for the drive are completely non-viable). We also consider the possibility that the X-shredder component may be lost from the SDGD<sup>dsx</sup> construct during homing (bottom panel, blue dashed line), such that out of the drive alleles transmitted from female or male W/D individuals, 0.01% will not have a functioning X-shredder component. For low to mid-fitness costs, the predicted load is similar to that of the dsxF<sup>CRISPRh</sup> drive-only construct since the fraction of drive individuals without an intact X-shredder is high; for high fitness costs, the load merges with that of intact SDGD<sup>dsx</sup> (blue solid line) since almost all drive individuals have an intact X-shredder. We use representative parameters for both constructs for comparison (drive transmission  $a_f = a_m = 0.95$  for both males and females; rate of resistance  $u_f = u_m = 0.5$ ; X-shredding parameter for SDGD<sup>dsx</sup> is  $m=0.95$ ; no reduction in fitness for heterozygote males).

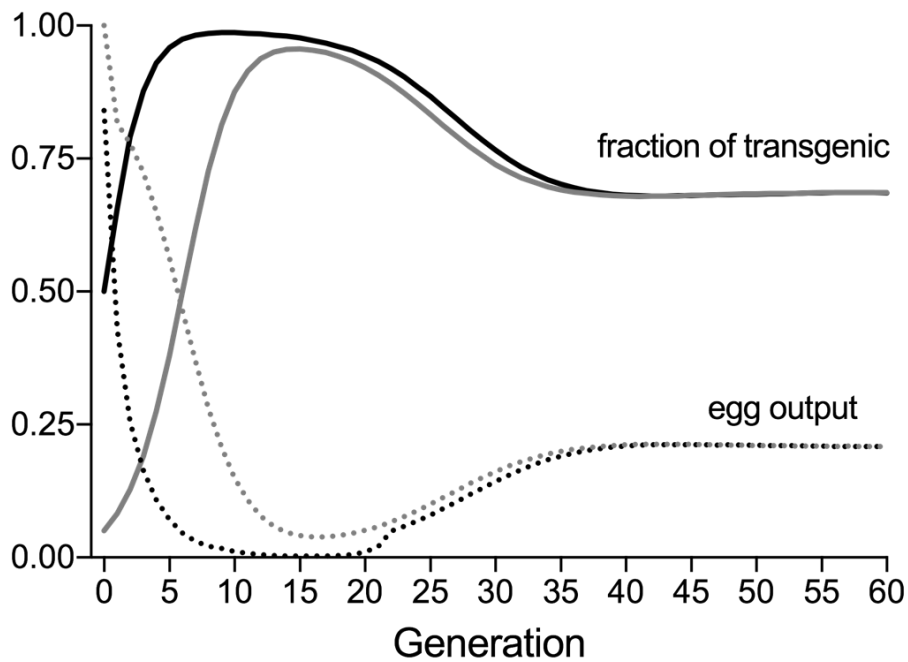

**Supplementary Figure 13**

Time dynamics of the frequency of  $SDGD^{dsx}$  transgenic individuals and relative egg output

Time dynamics of the frequency of  $SDGD^{dsx}$  transgenic individuals (solid lines) and relative eggs output (dotted lines) in the population as predicted by the deterministic discrete-generation model using experimental parameters given in Supp Table 2 and assuming two initial releases of 50% of  $SDGD$  heterozygote males and females (black line) or 10%  $SDGD$  heterozygous males only (grey line). Independently of the release scenarios, for these parameters, the frequency of transgenic individuals reaches an intermediate equilibrium while  $W$ ,  $R$  and  $D$  alleles and the egg output is reduced (population suppressed).

## Supplementary Tables

**Supplementary Table 1 | Summary of values ( $\pm$  s.e.m.) obtained from crossed of the different SDGD developed in this study.**

| Target gene      | Promoter Cas9 | Promoter I-Ppol      | Transgenic parent | N  | Average eggs per female | Hatched larvae   | Hatching rate   | Transmission rate (RFP+) | Fraction of Males |
|------------------|---------------|----------------------|-------------------|----|-------------------------|------------------|-----------------|--------------------------|-------------------|
| AGAP007280       | vasa2         | beta2                | Male x wt         | 23 | 16.9 $\pm$ 2.80         | 3.72 $\pm$ 1.02  | 0.23            | na                       | na                |
|                  |               |                      | Female x wt       | 2  | 61.3 $\pm$ 42.12        | 2.45 $\pm$ 1.63  | 0.07            | na                       | na                |
| AGAP011377       | vasa2         | beta2                | Male x wt         | 35 | 124.9 $\pm$ 8.18        | 97.5 $\pm$ 8.37  | 0.78            | 0.79 $\pm$ 0.17          | 0.92 $\pm$ 0.08   |
|                  |               |                      | Female x wt       | 20 | 5.3 $\pm$ 1.63          | 2.45 $\pm$ 1.03  | 0.47            | 0.69 $\pm$ 0.07          | 0.48 $\pm$ 0.13   |
| AGAP005958       | vasa2         | beta2                | Male x wt         | 33 | 97.5 $\pm$ 7.61         | 66.0 $\pm$ 7.99  | 0.68            | 0.94 $\pm$ 0.08          | 0.94 $\pm$ 0.08   |
|                  |               |                      | Female x wt       | 32 | 6.42 $\pm$ 1.41         | 0.1 $\pm$ 0.05   | 0.014           | na                       | na                |
| AGAP004050 (dsx) | zpg           | beta2 <sup>244</sup> | Male x wt         | 71 | 130.2 $\pm$ 7.72        | 126.7 $\pm$ 6.39 | 0.84 $\pm$ 0.02 | 0.96 $\pm$ 0.01          | 0.93 $\pm$ 0.08   |
|                  |               |                      | Female x wt       | 44 | 115.1 $\pm$ 10.2        | 98.8 $\pm$ 10.4  | 0.67 $\pm$ 0.05 | 0.99 $\pm$ 0.01          | 0.48 $\pm$ 0.14   |

**Supplementary Table 2 | Model parameters for Sex Distorter Gene Drive (SDGD<sup>dsx</sup>)**

| Parameter                                                                                | Estimate                                                                                                                                    | Method of estimation                                  |
|------------------------------------------------------------------------------------------|---------------------------------------------------------------------------------------------------------------------------------------------|-------------------------------------------------------|
| Mating probability <sup>†</sup>                                                          | 0.85                                                                                                                                        | Estimated from Hammond et al. 2017; Kyros et al. 2018 |
| Egg production, wildtype female crossed with wildtype male <sup>†</sup>                  | 150                                                                                                                                         | From assays of mated females                          |
| Egg production, W/D female crossed with wildtype male <sup>†</sup>                       | 115 (relative to 150 for WT = 0.77)                                                                                                         | From assays of mated females                          |
| Egg production, wildtype female crossed with W/D male <sup>†</sup>                       | 132 (relative to 150 for WT = 0.88)                                                                                                         | From assays of mated females                          |
| Hatching probability, wildtype <sup>†</sup>                                              | 0.88                                                                                                                                        | From assays of mated females                          |
| Hatching probability, W/D heterozygous female crossed with wildtype male <sup>†</sup>    | 0.72 (relative to 0.88 for WT = 0.81)                                                                                                       | From assays of mated females                          |
| Hatching probability, W/D heterozygous male crossed with wildtype female <sup>†</sup>    | 0.86 (relative to 0.88 for WT = 0.97)                                                                                                       | From assays of mated females                          |
| Fertility of W/D female (relative to WT, for deterministic model), ( $w_{WD,xx}$ )       | 0.627                                                                                                                                       | From assays of mated females                          |
| Fertility of W/D male (relative to WT, for deterministic model)*                         | 0.8536                                                                                                                                      | From assays of mated females                          |
| Additional cost to females due to carrying two damaged X-chromosomes ( $s_{x,f}$ )       | 0                                                                                                                                           | Baseline                                              |
| Dominance coefficient for damaged X in females ( $h_{x,f}$ )                             | ½                                                                                                                                           | Baseline                                              |
| Additional cost to males due to carrying damaged X-chromosome ( $s_{x,m}$ )              | 0                                                                                                                                           | Baseline                                              |
| Transmission of drive by W/D heterozygous females, ( $d_f$ )                             | 1                                                                                                                                           | Observed fraction transgenic from assays              |
| Transmission of drive by W/D heterozygous males, ( $d_m$ )                               | 0.96                                                                                                                                        | Observed fraction transgenic from assays              |
| Male sex bias of progeny of W/D heterozygous males ( $m = m_1 = m_2$ )                   | 0.93                                                                                                                                        | Observed from assays                                  |
| Meiotic EJ parameter (fraction non-drive alleles that are resistant) ( $u = u_f = u_m$ ) | 0.469                                                                                                                                       | Estimated from Hammond et al. 2016; Kyros et al. 2018 |
| Probability of emergence from pupa (survival from larva) <sup>†</sup>                    | 0.89                                                                                                                                        | Estimated from Kyros et al. 2018                      |
| Initial population (zero generation) <sup>†</sup>                                        | 50% release: 150 WT males/females, 150 W/D heterozygous males/females; 10% release: 270 WT males, 30 W/D heterozygous males, 300 WT females | Following cage experiments                            |

<sup>†</sup> For stochastic model. Note values are averages if there are parental effects (in fitnesses, drive).

\*This fertility is assumed in the model for all males with one or two copies of the SDGD allele ( $w_{WD,XY}, w_{DD,XY}, w_{DR,XY}$ ).



**Supplementary Table 3 | Analysis of SDGD<sup>dsx</sup> females with and without a copy of “modified” X chromosome.**

| Cross                                                            | Eggs <sup>1</sup>      | % eggs hatching <sup>2</sup> | Transgenic rate <sup>3</sup> | Male progeny (% of sum ± SD) <sup>4</sup> | Male progeny (average of % ± SEM) <sup>4</sup> | P value                                     |
|------------------------------------------------------------------|------------------------|------------------------------|------------------------------|-------------------------------------------|------------------------------------------------|---------------------------------------------|
| X <sup>mod</sup> /X;SDGD <sup>dsx</sup> /+ ♀<br>x<br>wild-type ♂ | 130.7 ±<br>15.2 (n=19) | 69.8% n= 16<br>(2484)        | 100% (509)                   | 47.1 ± 0.17<br>n=13 (1261)                | 0.41 ± 0.05, n=13<br>(1261)                    | n.s. (P=<br>0.242,<br>t=1.203,<br>df=21.09) |
| X/X;SDGD <sup>dsx</sup> /+ ♀<br>x<br>wild-type ♂                 | 103.2 ±<br>13.1 (n=25) | 74.6% n=21<br>(2580)         | 100% (728)                   | 50.5 ± 0.13<br>n=19 (1190)                | 0.48 ± 0.03, n=19<br>(1190)                    |                                             |

Average number of eggs laid by n number of females analysed (±SEM). (2) Average percentage of larvae hatching from the eggs, from n females analysed. (3) Average percentage of transgenic progeny (RFP positive) out of total larvae screened. (4) Average percentage of males in the progeny (±SD) established from n females. Significance (Welch's t-test, two-tailed, unpaired two-sample with unequal variance) was tested comparing logit transformed percentages observed from the progeny of n females of the two groups. The total number of eggs or individuals counted in each experiment is given in parentheses.

**Supplementary Table 4 | The fitnesses of the 18 female genotypes and the proportion of each type of egg produced by them.**

| Female genotype | Fitness                         | Eggs produced           |         |                   |                         |         |                   |
|-----------------|---------------------------------|-------------------------|---------|-------------------|-------------------------|---------|-------------------|
|                 |                                 | W, x                    | D, x    | R, x              | W, X                    | D, X    | R, X              |
| WW, xx          | 1                               | 1                       | 0       | 0                 | 0                       | 0       | 0                 |
| WD, xx          | $w_{WD,xx}$                     | $(1 - d_f)(1 - u_f)$    | $d_f$   | $(1 - d_f)u_f$    | 0                       | 0       | 0                 |
| WR, xx          | $w_{WR,xx}$                     | 1/2                     | 0       | 1/2               | 0                       | 0       | 0                 |
| DD, xx          | $w_{DD,xx}$                     | 0                       | 1       | 0                 | 0                       | 0       | 0                 |
| DR, xx          | $w_{DR,xx}$                     | 0                       | 1/2     | 1/2               | 0                       | 0       | 0                 |
| RR, xx          | $w_{RR,xx}$                     | 0                       | 0       | 1                 | 0                       | 0       | 0                 |
| WW, xX          | $1 - h_{x,f}s_{x,f}$            | 1/2                     | 0       | 0                 | 1/2                     | 0       | 0                 |
| WD, xX          | $w_{WD,xx}(1 - h_{x,f}s_{x,f})$ | $1/2(1 - d_f)(1 - u_f)$ | $d_f/2$ | $1/2(1 - d_f)u_f$ | $1/2(1 - d_f)(1 - u_f)$ | $d_f/2$ | $1/2(1 - d_f)u_f$ |
| WR, xX          | $w_{WR,xx}(1 - h_{x,f}s_{x,f})$ | 1/4                     | 0       | 1/4               | 1/4                     | 0       | 1/4               |
| DD, xX          | $w_{DD,xx}(1 - h_{x,f}s_{x,f})$ | 0                       | 1/2     | 0                 | 0                       | 1/2     | 0                 |
| DR, xX          | $w_{DR,xx}(1 - h_{x,f}s_{x,f})$ | 0                       | 1/4     | 1/4               | 0                       | 1/4     | 1/4               |
| RR, xX          | $w_{RR,xx}(1 - h_{x,f}s_{x,f})$ | 0                       | 0       | 1/2               | 0                       | 0       | 1/2               |
| WW, XX          | $1 - s_{x,f}$                   | 0                       | 0       | 0                 | 1                       | 0       | 0                 |
| WD, XX          | $w_{WD,xx}(1 - s_{x,f})$        | 0                       | 0       | 0                 | $(1 - d_f)(1 - u_f)$    | $d_f$   | $(1 - d_f)u_f$    |
| WR, XX          | $w_{WR,xx}(1 - s_{x,f})$        | 0                       | 0       | 0                 | 1/2                     | 0       | 1/2               |
| DD, XX          | $w_{DD,xx}(1 - s_{x,f})$        | 0                       | 0       | 0                 | 0                       | 1       | 0                 |
| DR, XX          | $w_{DR,xx}(1 - s_{x,f})$        | 0                       | 0       | 0                 | 0                       | 1/2     | 1/2               |
| RR, XX          | $w_{RR,xx}(1 - s_{x,f})$        | 0                       | 0       | 0                 | 0                       | 0       | 1                 |

**Supplementary Table 5 | The fitnesses of the 12 male genotypes and the proportion of each type of sperm produced by them.**

| Male genotype | Fitness                  | Sperm produced |      |                               |                |                         |                         |           |                   |  |
|---------------|--------------------------|----------------|------|-------------------------------|----------------|-------------------------|-------------------------|-----------|-------------------|--|
|               |                          | W, x           | R, x | W, X                          | D, X           | R, X                    | W, Y                    | D, Y      | R, Y              |  |
| WW, xY        | 1                        | 1/2            | 0    | 0                             | 0              | 0                       | 1/2                     | 0         | 0                 |  |
| WD, xY        | $w_{WD,xY}$              | 0              | 0    | $(1 - m_1)(1 - d_m)(1 - u_m)$ | $(1 - m_1)d_m$ | $(1 - m_1)(1 - d_m)u_m$ | $m_1(1 - d_m)(1 - u_m)$ | $m_1 d_m$ | $m_1(1 - d_m)u_m$ |  |
| WR, xY        | $w_{WR,xY}$              | 1/4            | 1/4  | 0                             | 0              | 0                       | 1/4                     | 0         | 1/4               |  |
| DD, xY        | $w_{DD,xY}$              | 0              | 0    | 0                             | $(1 - m_2)$    | 0                       | 0                       | $m_2$     | 0                 |  |
| DR, xY        | $w_{DR,xY}$              | 0              | 0    | 0                             | $(1 - m_1)/2$  | $(1 - m_1)/2$           | 0                       | $m_1/2$   | $m_1/2$           |  |
| RR, xY        | $w_{RR,xY}$              | 0              | 1/2  | 0                             | 0              | 0                       | 0                       | 0         | 1/2               |  |
| WW, XY        | $1 - s_{X,m}$            | 0              | 0    | 1/2                           | 0              | 0                       | 1/2                     | 0         | 0                 |  |
| WD, XY        | $w_{WD,xY}(1 - s_{X,m})$ | 0              | 0    | $(1 - m_1)(1 - d_m)(1 - u_m)$ | $(1 - m_1)d_m$ | $(1 - m_1)(1 - d_m)u_m$ | $m_1(1 - d_m)(1 - u_m)$ | $m_1 d_m$ | $m_1(1 - d_m)u_m$ |  |
| WR, XY        | $w_{WR,xY}(1 - s_{X,m})$ | 0              | 0    | 1/4                           | 0              | 1/4                     | 1/4                     | 0         | 1/4               |  |
| DD, XY        | $w_{DD,xY}(1 - s_{X,m})$ | 0              | 0    | 0                             | $(1 - m_2)$    | 0                       | 0                       | $m_2$     | 0                 |  |
| DR, XY        | $w_{DR,xY}(1 - s_{X,m})$ | 0              | 0    | 0                             | $(1 - m_1)/2$  | $(1 - m_1)/2$           | 0                       | $m_1/2$   | $m_1/2$           |  |
| RR, XY        | $w_{RR,xY}(1 - s_{X,m})$ | 0              | 0    | 0                             | 0              | 1/2                     | 0                       | 0         | 1/2               |  |

## Supplementary Note

Full sequence of following vectors (in GenBank format)

|                                                             |    |
|-------------------------------------------------------------|----|
| <i>pB\</i> (b2-mCherry)-attB-dsRFP-244beta2-GFP vector..... | 6  |
| <i>pB\</i> (b2-mCherry)-attB-dsRFP-271beta2-GFP.....        | 11 |
| <i>pB\</i> (b2-mCherry)-attB-dsRFP-355beta2-GFP.....        | 16 |
| <i>pB\</i> (b2-mCherry)-attB-dsRFP-WTbeta2-GFP_v2.....      | 20 |

### ***pB\*(b2-mCherry)-attB-dsRFP-244beta2-GFP vector**

```
LOCUS          pB\ (b2-mCherry)-attB-dsRFP-244beta2-GFP          7976 bp    DNA    circular UNA 05-APR-
2017
DEFINITION    Mars-244.
ACCESSION    urn:local...z-781tst0
VERSION      urn:local...z-781tst0
KEYWORDS     .
SOURCE
  ORGANISM   .
FEATURES             Location/Qualifiers
   rep_origin        21..327
                     /label="f1_origin"
   CDS                complement(471..614)
                     /modified_by="User"
                     /label="lacZ_a"
   promoter          600..616
                     /label="M13_forward20_primer"
   promoter          626..644
                     /label="T7_promoter"
   misc_feature      join(677..>711,<5296..5321)
                     /created_by="User"
                     /label="MCS"
   ligation          708..711
                     /label="Ligation"
   ligation          712..715
                     /label="Ligation"
   misc_feature      716..2513
                     /Source="referenceToDocument: urn:local::14s-6crwd4p"
                     /label="Digestion of pUC-mCherry - Fragment 3 extraction
                     (concatenated sequence 2)"
                     /note="Geneious type: Concatenated sequence"
   promoter          725..1223
                     /vntifkey=29
                     /label="b2\promoter"
   CDS                1230..1940
                     /vntifkey=4
                     /label="mCherry"
   misc_feature      1949..2435
                     /vntifkey=21
                     /label="b2\3'UTR"
   misc_recomb       2458..2513
                     /vntifkey=86
                     /label="attB"
   ligation          2514..2517
                     /label="Ligation"
   misc_feature      2517^2518
                     /Original_Bases="A"
                     /label="A"
                     /note="Geneious type: Editing History Deletion"
   misc_feature      2518..5289
                     /Source="referenceToDocument: urn:local::14s-6crwd4p"
                     /label="Digestion of pUC-RFP-244b2GFP - Fragment 1
                     extraction (concatenated sequence 3)"
                     /note="Geneious type: Concatenated sequence"
   primer_bind       2518..2538
                     /Sequence="ATGGTGCGCTCCTCCAAGAAC"
                     /Hairpin_Tm="40.3"
                     /Tm="63.0"
                     /Self_Dimer_Tm="19.3"
                     /%GC="57.1"
                     /created_by="primer3"
                     /label="aaa"
```

```

CDS                2518..3195
                   /vntifkey=4
                   /label="DsRed\ (RFP) "
terminator         3206..3439
                   /vntifkey=43
                   /label="SV40"
promoter           3469..4067
                   /vntifkey=21
                   /modified_by="User"
                   /label="b2promoter"
misc_feature       3484..3487
                   /vntifkey=21
                   /label="GATA"
misc_feature       3570..3619
                   /created_by="User"
                   /label="RE 0.41"
misc_feature       3578..3627
                   /created_by="User"
                   /label="RE 0.49"
misc_feature       3627..3676
                   /created_by="User"
                   /label="RE 0.36"
Synthetic          3721..3820
                   /created_by="User"
                   /modified_by="User"
                   /label="Spacer"
misc_feature       3852..3855
                   /vntifkey=21
                   /label="GATA"
misc_feature       3962..3965
                   /vntifkey=21
                   /label="GATA"
misc_feature       4059..4062
                   /vntifkey=21
                   /label="GATA"
CDS                4071..>4787
                   /vntifkey=4
                   /modified_by="User"
                   /label="eGFP"
terminator         4790..5285
                   /vntifkey=21
                   /modified_by="User"
                   /label="b2terminator"
misc_feature       <5290..5295
                   /Source="referenceToDocument: urn:local::li-781tstq"
                   /label="Annealed link-E2-F2 extraction (concatenated
                   sequence 2)"
                   /note="Geneious type: Concatenated sequence"
ligation           5290..5293
                   /label="Ligation"
misc_feature       5294..711
                   /label="Digestion of pBC-Linker-E2-F2 - Fragment 2
                   (concatenated sequence 1)"
                   /note="Geneious type: Concatenated sequence"
ligation           5296..5299
                   /label="Ligation"
promoter           complement(5348..5367)
                   /label="T3_promoter"
promoter           complement(5384..5402)
                   /label="M13_reverse_primer"
misc_feature       complement(5401..5423)
                   /label="M13_pUC_rev_primer"
promoter           complement(5437..5466)
                   /label="lac_promoter"
primer_bind       complement(5700..5723)
                   /Sequence="CCTGCGTTATCCCCTGATTCTGTG"
                   /Hairpin_Tm="32.2"
                   /Tm="63.3"
                   /Self_Dimer_Tm="None"
                   /%GC="54.2"
                   /created_by="primer3"
                   /label="Bluescript_r2"
primer_bind       5733..5754
                   /Sequence="GTGAGCAAAGGCCAGCAAAG"
                   /Hairpin_Tm="46.5"
                   /Tm="61.4"
                   /Self_Dimer_Tm="11.3"
                   /%GC="50.0"
                   /created_by="primer3"
                   /Extension="TTAATTAA"

```

```

/modified_by="User"
/label="pBC_Pac"
primer_bind 5754..5774
/Sequence="GGCCAGGAACCGTAAAAAGGC"
/Hairpin_Tm="None"
/Tm="62.1"
/Self_Dimer_Tm="0.9"
/%GC="57.1"
/created_by="primer3"
/Extension="TTAATTAA"
/modified_by="User"
/label="BluescriptPacI_f"
rep_origin complement(5775..6394)
/label="pBR322_origin"
gene 6701..7360
/label="CAT/CamR"
/label="CAT/CamR"
CDS 6701..7360
/translation="MEKKITGYTTVDISQWHRKEHFQSVQCTYNQTVQLDITAF
LKTVKKNKHKFYPAFTHILARLMAHPELRMAMKDGELVIWDSVHPCYTVFHEQTETF
SSLWSEYHDDFRQFLHIYSQDVACYGENLAYFPKGF IENMFFV SANPWVSTSFDLNV
ANMDNFFAPVFTMGKYTQGDKVLMLPLAIQVHHA VCDGFHVRMLNELQQYCEWQGG
A*"
/label="ORF frame 1"
gene complement(7647..7847)
/label="Ampicillin (860 - 660)"
/translation="MEKKITGYTTVDISQWHRKEHFQSVQCTYNQTVQLDITAF
LKTVKKNKHKFYPAFTHILARLMAHPELRMAMKDGELVIWDSVHPCYTVFHEQTETF
SSLWSEYHDDFRQFLHIYSQDVACYGENLAYFPKGF IENMFFV SANPWVSTSFDLNV
ANMDNFFAPVFTMGKYTQGDKVLMLPLAIQVHHA VCDGFHVRMLNELQQYCEWQGG
A*"
/label="Ampicillin (860 - 660)"
promoter complement(7890..7918)
/translation="MEKKITGYTTVDISQWHRKEHFQSVQCTYNQTVQLDITAF
LKTVKKNKHKFYPAFTHILARLMAHPELRMAMKDGELVIWDSVHPCYTVFHEQTETF
SSLWSEYHDDFRQFLHIYSQDVACYGENLAYFPKGF IENMFFV SANPWVSTSFDLNV
ANMDNFFAPVFTMGKYTQGDKVLMLPLAIQVHHA VCDGFHVRMLNELQQYCEWQGG
A*"
/label="AmpR_promoter"

```

ORIGIN

```

1 ctgacgcgcc ctgtagcggc gcattaagcg cggcgggtgt ggtggttacg cgcagcgtga
61 ccgctacact tgccagcgcc cttagcggcc ctcctttcgc tttcttccct tcctttctcg
121 ccacgttcgc cggttttccc cgctcaagctc taaatcgggg gctcccttta gggttccgat
181 ttagtgcttt acggcacctc gaccccaaaa aactgatta ggtgatggt tcacgtagt
241 ggccatcgcc ctgatagacg gtttttcgcc ctttgacgtt ggagtccacg tcttttaata
301 gtggactcct gttccaaact ggaacaacac tcaacccat ctcggtctat tcttttgatt
361 tataagggat tttgcccatt tcggcctatt ggttaaaaaa tgagctgatt taacaaaaat
421 ttaacgcgaa ttttaacaaa atattaacgc ttacaatttc cattcgccat tcagctcgc
481 caactgttgg gaagggcgat cgggtcgggc ctcttcgcta ttacgccagc tggcgaaagg
541 gggatgtgct gcaagcgcat taagtgggt aacgccaggg ttttccagc cagcagcttg
601 taaaacgacg gccagtgagc gcgcgtaata cgactcacta tagggcgaat tggagctcca
661 ccgctgcttc ggcgcctcta gaactagtgg atccccggg ctgcaggaat tatccccgc
721 cggctctagc ttcataaattg atatagtttt gtaaatagaca tgacagtttt ttattttttt
781 tttatccata attacgaatt gaacaactct acacacatat taattgcaag aacttatgct
841 acataaatg gatgaaagtg gatgcatcat cccatccaag aagaacatag aatttattg
901 ctgcatcgca atggccgaa ccagcaaaa atgatcatag tagtcatatg agccgtactg
961 gccgatcat ttcgtgcaga accttcagag acgttggtcg acagattgat agaactgtg
1021 tagttagtcc attcaaaaag ttgttccatt agggacaaaa gaaaaaaacg gcttaaacat
1081 gaaatttgtg taccagtag gaatcgcgta ttcggccgat agagtcctt ccgtaagtat
1141 tcccagcgt tagagagcaa cgctcgtcgc ttccaaaatc cgctaaatat caaacggctt
1201 tcacagtttc gaaagatata aagctcgaga ttggtgagcaa gggcaggag gataacatgg
1261 ccatcatcaa ggagtccatg cgcttcaagg tgcacatgga gggctccgtg aacggccaag
1321 agttcgagat cgagggcgag ggcgagggcc gccctacga gggcaccag accgccaagc
1381 tgaaggtgac caaggggtgc cccctgccct tcgctggga catcctgtcc cctcagttca
1441 tgtacggctc caagcctac gtgaagcacc ccgccgacat ccccgactac ttgaagctgt
1501 ccttccccga gggttcaag tgggagcgcg tgatgaactt cgaggacggc ggcgtggtga
1561 ccgtgaccca ggaactcctc ctgcaggacg gcgagttcat ctacaaggtg aagctgcgcg
1621 gcaccaactt cccctccgac ggccccgtaa tgcagaagaa gaccatgggc tgggaggcct
1681 cctccgagcg gatgtacccc gaggacggcg cctgaaggg cgagatcaag cagaggctga
1741 agctgaagga cggcggccac tacgacgctg aggtcaagac cacctacaag gccagaagc
1801 ccgtgcagct gcccgcgccc tacaacgtca acatcaagtt ggacatcacc tcccacaacg
1861 aggactacac catcgtggaa cagtacgaac gcgcccaggg ccgcccactc accggcggca
1921 tggacgagct gtacaagtaa ttaattaact aaagctaaat tgaacaccct aaattatgtg
1981 taaaatttct gctaagcagc ggtgtgggg tcaataaaaa tgttttttct cactctattc
2041 gcttcgtttt tgttgcatt tctcagtttt tgctctgtac tcatgtgtaa ggattagtgc
2101 agttagggga agtagctccg aagttttctg gaatcgtttc cggatagtag gttcggattt
2161 agtttccgga atcggctccg gaattgggtc cggaaattgat tccgggatca gaattggctc
2221 aaaattctca tggagattcc cagagtgatt tcgcttctga aacttcgtat ttaattcaag
2281 aattgatccc cttctggag ctaattccaa ttctggagtc aattctgatt ctgttaccgg
2341 aacaaattgc gattcccagg tcaatgcccc ttcccgggtn gattctgatt ccggagttgg

```

2401 aatcagctcc ggaattggaa tcggtcctta aatcggggcg gccacatgtg gccagctgc  
2461 ggggtgccagg ccgtgccctt gggctcccc ggcgcgtact ccacctcacc catcaacatg  
2521 gtgcgctcct ccaagaacgt catcaaggag ttcatgcgct tcaagggtgc catggagggc  
2581 accgtgaacg gccacgagtt cgagatcgag ggcgagggcg agggccgcc ctacgagggc  
2641 cacaacaccg tgaagctgaa ggtgaccaag ggcggccccc tgcccttcgc ctgggacatc  
2701 ctgtccccc agttccagta cggctccaag gtgtacgtga agcaccccgc cgacatcccc  
2761 gactacaaga agctgtcctt ccccaggggc tcaagtggg agcgcgtgat gaacttcgag  
2821 gacggcgggc tggtagccgt gaccaggac tcctcctgc aggaoggtg ctcatctac  
2881 aagggtgaagt tcacggcgt gaactcccc tcgcagggc ccgtaatgca gaagaagacc  
2941 atgggtggg aggcctccac cgagcgcctg tacccccgc acggogtgc gaagggcgag  
3001 atccacaagg cccctgaagct gaaggacggc ggcactacc tgggtgagtt caagtccatc  
3061 tacatggcca agaagcccgt gcagctgccc ggctactact acgtggactc caagctggac  
3121 atccactccc acaacgagga ctacaccatc gtggagcagt acgagcgac cgagggccgc  
3181 caccactgt tcctgtagcg gccgcgactc tagatcataa tcagccatac cacatttcta  
3241 gaggttttac ttgctttaa aaacctccca cacctcccc tgaacctgaa acataaaatg  
3301 aatgcaattg ttgtgttaa cttgtttatt gcagcttata atggttacia ataaagcaat  
3361 agcatcacia atttcaciaa taaagcattt tttcactgc attctagttg tggttgtcc  
3421 aaactcatca atgtatotta aagcttatcg atacgcgtac ggcgcgccct agcgttata  
3481 attgatatag ttttgtaaat gacatgacag ttttttatt tttttttatc cataattacg  
3541 aattgaacia ctctacacac atattaattg caagaactta tgctacataa tatggaggaa  
3601 agtggatgca tcaccccatc caagaagaca tacgaattta tttgtggcat cgcaatcggc  
3661 cgaaccagca aaagatgac atagtagtca tatgagccgt acgtgccgga tcatttcgtg  
3721 gactcggacc cgagttggcc aacgaccac gggcggagt agggcggtg gtgagaagtg  
3781 cgcgtctcgt tcccgcagct cgccagcact ctcagactca cagaacctc agagacgtt  
3841 gtcgacagat tgatgaaac tgtgtagtta gtccattac aaagttgttc cattagggc  
3901 aaaagaaaaa aacggcttaa actagaaatt tgtgtacca gttagaatcg cgtattcggc  
3961 cgatagaggt ccttccgtaa gtattcccag cgcttagaga gcaacgctc tgcttccaa  
4021 aatccgctaa atatacaac gcttccacag tttcgaaga tatcaagctt atggtgagca  
4081 agggcgagg gctgtccacc ggggtgggtc ccatcctgt agcgtggac ggcgacgtaa  
4141 acggccacia gttcagcgtg tccggcgagg gcgagggcga tgccacctac ggaagctga  
4201 ccctgaagtt catctgcacc accggcaagc tgcccgtgcc ctggcccacc ctctgacca  
4261 ccctgaccta cggcgtgcag tgcttcagcc gctaccccga ccacatgaag cagcacgact  
4321 tcttcaagtc ccctatgccc gaaggctacg tccaggagcg caccatcttc tcaaggacg  
4381 acggcaacta caagaccgc gccgaggtga agttcgagg cgacacctg gtgaaccgca  
4441 tcgagctgaa gggcatcgac ttcaaggagg acggcaacat cctggggcac aagctggagt  
4501 acaactacia cagccacaac gtctatatca tggccgaaa gcagaagaac ggcatacaag  
4561 tgaactcoa gattccggcc aacatcgagg acggcagcgt agcgtcgcg gaccactacc  
4621 agcagaacac ccccatcgcc gacggcccc tgctgctgcc cgacaaccac tacctgagca  
4681 cccagtcgc cctgagcaaa gaccccaacg agaagcgcga tcacatggtc ctgctggagt  
4741 tcgtgaccg ccgcgggata actctcggca tggacagct gtacaagtaa gcttaactaa  
4801 agctaaattg aacaccctaa attatgtgta aaatttctgc taagcagcgg tgtggggtc  
4861 aataaaatg ttttttcca ctctattcgc ttcgttttg ttgcccattc tcagttttg  
4921 cttcgtactc atgtgtaagg attagtgcag tgatgggag tagctccgaa gttttctgga  
4981 atcgtttccg gatagtaggt tcggtattag tttccgaaat cggctccgga atggttccg  
5041 gaattgattc ggggacaga attggtcaa aattctcatg gagattccca gagtgattc  
5101 gcttctgaaa cttcgtattt aattcaagaa ttgatccca tctggagct aattccaatt  
5161 ctggagtcaa ttctgattct gttaccgaa caaattgcga tcccaggtc aatgccatt  
5221 ccggggacga ttctgattcc gtagttggaa tcagctccg aattggaatc gtccttaa  
5281 tcgggcgcgc ctaggagctt atcgataccg tcgacctcga gggggggccc ggtaccagc  
5341 ttttgttccc ttttagtgagg gttaattgag cgctggcgt aatcatggtc atagctgtt  
5401 cctgtgtgaa attgttatcc gctcacaatt ccacacaa taacgagccg aagcataaag  
5461 tgtaaaagcct ggggtgccta atgagtgagc taactcacat taattgcgt taactcactg  
5521 cccgctttcc agtcgggaaa cctgtcgtgc cagctgcatt aatgaatcgg ccaacgcgcg  
5581 gggagaggc gtttgcgtat tggcgcctc tccgcttcc ctgcactca aggcggtaat  
5641 tcggtcgttc ggtgcggcg agcggtatca gctcactca aaggccagca aaagccagc  
5701 acagaatcag ggtataacgc aggaagaac atgtgagcaa aaggccagca aaagccagc  
5761 aaccgtaaaa aggcgcggtt gctggcgttt tccatagcc tccgcccc tgacgagcat  
5821 caaaaaatc gacgtcaag tcagaggtg cgaaaccgca caggactata aagataccag  
5881 gcgtttccc cttgaaagct cctcgtgcgc tctcctgttc cgacctgccc gcttaccgga  
5941 tacctgtccg ctttctccc ttcgggaagc gtggcgttt ctcatagctc acgctgtagg  
6001 tatctcagtt cgggtgaggt cgttccgctc aagctgggct gtgtgcacga accccccgtt  
6061 cagcccagcc gctgcgctt atccggtaac tatcgtctt agtccaacc ggaagacac  
6121 gacttatcgc cactggcagc agccactggt aacaggatta gcagagcgag gtatgtaggc  
6181 ggtgctacag agttcttgaa gtgggtggcct aactacggct aactagaag gacagtattt  
6241 ggtatctgag ctctgctgaa gccagttacc ttcgaaaaa gagtggtag ctcttgatcc  
6301 ggcaaaaaa ccaccgctg tagcgggtgt tttttgttt gcaagcagca gattacggc  
6361 agaaaaaaag gatctcaaga atccttttga atcttttcta cggggtctga cgtcagtg  
6421 aacgaaaact cacgttaagg gattttgttc atgagattat caaaaaggat ctccacctag  
6481 atccttttcg accgaataaa tacctgtgac ggaagatcac ttcgcagaat aaataaatcc  
6541 tgggtcctc atgtgatcc ggaagccctg ggccaactt tggcgaaaa gagacgttga  
6601 tcggcagcta agaggttcca actttcacca taatgaaata agatcactac cggcgtatt  
6661 ttttgagttg tcgagatttt caggagctaa ggaagctaaa atggagaaaa aatcactgg  
6721 atataccacc gttgatata cccaatggca tcgtaagaa cattttgagg catttcagtc  
6781 agttgtctaa gttactata accagaccgt tcagctggat attaogcct ttttaaagac  
6841 cgtaaaagaa aataagcaca agttttatc ggcctttatt cacattcttg cccgctgat  
6901 gaatgctcat ccggaattac gtatggcaat gaaagacggt gagctgggtg tatgggatag  
6961 tgttccacct tgttacaccg ttttccatga gcaaaactgaa acgttttcat cgtctggag  
7021 tgaataccac cagcatttcc ggcagtttct acacataat tcgcaagatg tggcgtgta  
7081 cggtgaaaa cctggcctatt tccctaaagg gtttattgag aatatgttt tcgtctcagc  
7141 caatccctgg gtgagtttca ccagttttga tttaaactg gccaatatg acaacttctt

7201 cgccccggtt ttcacatg gcaaatatta tacgcaaggc gacaagggtc tgatgccgct  
7261 ggcgattcag gttcatcatg ccgtttgtga tggcttccat gtcggcagaa tgcttaatga  
7321 attacaacag tactgcgatg agtggcaggg cggggcgtaa tttttttaag gcagttattg  
7381 gtgcccttaa acgcctggtt gctacgcctg aataagtgat aataagcgga tgaatggcag  
7441 aaattcgaaa gcaaattcga cccggtcgtc gggtcagggc aggtcgtta aatagccgct  
7501 tatgtctatt gctggtttac cggtttattg actaccggaa gcagtgtgac cgtgtgcttc  
7561 tcaaatgcct gaggccagtt tgctcaggct ctcccgtgg aggtaataat tgacgatatg  
7621 atcctttttt tctgatcaaa agtgctcadc attggaaaac gttcttcggg gcgaaaactc  
7681 tcaaggatct taccgctggt gagatccagt tcgatgtaac cactcgtgc acccaactga  
7741 tcttcagcat cttttacttt caccagcgtt tctgggtgag caaaaacagg aaggcaaaat  
7801 gccgcaaaaa agggaataag ggcgacacgg aaatggtgaa tactcactact cttcctttt  
7861 caatattatt gaagcattta tcaagggtta ttgtctcatg agcggataca tatttgaatg  
7921 tatttagaaa aataaacaat taggggttcc gcgcacattt cccgaaaag tgccac

//



**pB\ (b2-mCherry)-attB-dsRFP-271beta2-GFP**

```

LOCUS      pB\ (b2-mCherry)-attB-dsRFP-271beta2-GFP      7976 bp      DNA      circular UNA 23-MAR-
2017
DEFINITION Mars-271.
ACCESSION  urn.local...10-781tst0
VERSION    urn.local...10-781tst0
KEYWORDS   .
SOURCE     .
ORGANISM   .
FEATURES   Location/Qualifiers
    rep_origin      21..327
                    /label="f1_origin"
    CDS              complement(471..614)
                    /modified_by="User"
                    /label="lacZ_a"
    promoter         600..616
                    /label="M13_forward20_primer"
    promoter         626..644
                    /label="T7_promoter"
    misc_feature     join(677..>711,<5296..5321)
                    /created_by="User"
                    /label="MCS"
    ligation         708..711
                    /label="Ligation"
    ligation         712..715
                    /label="Ligation"
    misc_feature     716..2513
                    /Source="referenceToDocument: urn:local::14s-6crwd4p"
                    /label="Digestion of pUC-mCherry - Fragment 3 extraction
                    (concatenated sequence 2)"
                    /note="Geneious type: Concatenated sequence"
    promoter         725..1223
                    /vntifkey=29
                    /label="b2\promoter"
    misc_feature     945..950
                    /Recognition_pattern="CA^TATG"
                    /annotation_group="CATATG"
                    /label="NdeI@1"
                    /note="Geneious type: restriction site"
    CDS              1230..1940
                    /vntifkey=4
                    /label="mCherry"
    misc_feature     1663..1668
                    /Recognition_pattern="C^CATGG"
                    /annotation_group="CCATGG"
                    /label="NcoI@1"
                    /note="Geneious type: restriction site"
    misc_feature     1949..2435
                    /vntifkey=21
                    /label="b2\3'UTR"
    misc_recomb      2458..2513
                    /vntifkey=86
                    /label="attB"
    ligation         2514..2517
                    /label="Ligation"
    misc_feature     2517^2518
                    /Original_Bases="A"
                    /label="A"
                    /note="Geneious type: Editing History Deletion"
    misc_feature     2518..5289
                    /Source="referenceToDocument: urn:local::14s-6crwd4p"
                    /label="Digestion of pUC-RFP-271b2GFP - Fragment 1
                    extraction (concatenated sequence 3)"
                    /note="Geneious type: Concatenated sequence"
    primer_bind      2518..2538
                    /Sequence="ATGGTGGCTCCTCCAAGAAC"
                    /Hairpin_Tm="40.3"
                    /Tm="63.0"
                    /Self_Dimer_Tm="19.3"
                    /%GC="57.1"
                    /created_by="primer3"
                    /label="aaa"
    CDS              2518..3195
                    /vntifkey=4
                    /label="DsRed\ (RFP) "
    misc_feature     2939..2944
                    /Recognition_pattern="C^CATGG"
                    /annotation_group="CCATGG"
                    /label="NcoI@1"

```

```

terminator      /note="Geneious type: restriction site"
                3206..3439
                /vntifkey=43
                /label="SV40"
promoter        3469..4067
                /vntifkey=21
                /modified_by="User"
                /label="b2promoter"
misc_feature    3484..3487
                /vntifkey=21
                /label="GATA"
misc_feature    3570..3619
                /created_by="User"
                /label="RE 0.41"
misc_feature    3578..3627
                /created_by="User"
                /label="RE 0.49"
misc_feature    3627..3676
                /created_by="User"
                /label="RE 0.36"
misc_feature    3689..3694
                /Recognition_pattern="CA^TATG"
                /annotation_group="CATATG"
                /label="NdeI@1"
Synthetic       3694..3793
                /note="Geneious type: restriction site"
                /created_by="User"
                /modified_by="User"
                /label="spacer"
misc_feature    3852..3855
                /vntifkey=21
                /label="GATA"
misc_feature    3962..3965
                /vntifkey=21
                /label="GATA"
misc_feature    4059..4062
                /vntifkey=21
                /label="GATA"
CDS             4071..>4787
                /vntifkey=4
                /modified_by="User"
                /label="eGFP"
terminator      4790..5285
                /vntifkey=21
                /modified_by="User"
                /label="b2terminator"
misc_feature    <5290..5295
                /Source="referenceToDocument: urn:local:..11-781tstv"
                /label="Annealed link-E2-F2 extraction (concatenated
                sequence 2)"
                /note="Geneious type: Concatenated sequence"
ligation        5290..5293
                /label="Ligation"
misc_feature    5294..711
                /label="Digestion of pBC-Linker-E2-F2 - Fragment 2
                (concatenated sequence 1)"
                /note="Geneious type: Concatenated sequence"
ligation        5296..5299
                /label="Ligation"
promoter        complement(5348..5367)
                /label="T3_promoter"
promoter        complement(5384..5402)
                /label="M13_reverse_primer"
misc_feature    complement(5401..5423)
                /label="M13_pUC_rev_primer"
promoter        complement(5437..5466)
                /label="lac_promoter"
primer_bind     complement(5700..5723)
                /Sequence="CCTGCGTTATCCCCTGATTCTGTG"
                /Hairpin_Tm="32.2"
                /Tm="63.3"
                /Self_Dimer_Tm="None"
                /%GC="54.2"
                /created_by="primer3"
                /label="Bluescript_r2"
primer_bind     5733..5754
                /Sequence="GTGAGCAAAGGCCAGCAAAG"
                /Hairpin_Tm="46.5"
                /Tm="61.4"
                /Self_Dimer_Tm="11.3"

```

```

/%GC="50.0"
/created_by="primer3"
/Extension="TTAATTAA"
/modified_by="User"
/label="pBC_Pac"
primer_bind 5754..5774
/Sequence="GGCCAGGAACCGTAAAAAGGC"
/Hairpin_Tm="None"
/Tm="62.1"
/Self_Dimer_Tm="0.9"
/%GC="57.1"
/created_by="primer3"
/Extension="TTAATTAA"
/modified_by="User"
/label="BluescriptPacI_f"
rep_origin complement(5775..6394)
/label="pBR322_origin"
gene 6701..7360
/gene="CAT/CamR"
/label="CAT/CamR"
CDS 6701..7360
/translation="MEKKITGYTTVDISQWHRKEHFQSVQCTYNQTVQLDITAF
LKTVKKNKHKFYPAFIHILARLMNAHPELRMAMKDGELVIWDSVHPCYTVFHEQTETF
SSLWSEYHDDFRQFLHIYSQDVACYGENLAYFPKGF IENMFFV SANPWVSFTSFDLNV
ANMDNFFAPVFTMGKYTTQGDKVLMLPLAIQVHHAVCDGFHVGRLNELQQYCDEWQGG
A*"
/label="ORF frame 1"
misc_feature 7215..7220
/Recognition_pattern="C^CATGG"
/annotation_group="CCATGG"
/label="NcoI@1"
/note="Geneious type: restriction site"
gene complement(7647..7847)
/gene="Ampicillin (860 - 660)"
/translation="MEKKITGYTTVDISQWHRKEHFQSVQCTYNQTVQLDITAF
LKTVKKNKHKFYPAFIHILARLMNAHPELRMAMKDGELVIWDSVHPCYTVFHEQTETF
SSLWSEYHDDFRQFLHIYSQDVACYGENLAYFPKGF IENMFFV SANPWVSFTSFDLNV
ANMDNFFAPVFTMGKYTTQGDKVLMLPLAIQVHHAVCDGFHVGRLNELQQYCDEWQGG
A*"
/label="Ampicillin (860 - 660)"
promoter complement(7890..7918)
/translation="MEKKITGYTTVDISQWHRKEHFQSVQCTYNQTVQLDITAF
LKTVKKNKHKFYPAFIHILARLMNAHPELRMAMKDGELVIWDSVHPCYTVFHEQTETF
SSLWSEYHDDFRQFLHIYSQDVACYGENLAYFPKGF IENMFFV SANPWVSFTSFDLNV
ANMDNFFAPVFTMGKYTTQGDKVLMLPLAIQVHHAVCDGFHVGRLNELQQYCDEWQGG
A*"
/label="AmpR_promoter"
ORIGIN
1 ctgacgcgcc ctgtagcgcc gcattaagcg cggcgggtgt ggtggttacg cgcagcgtga
61 ccgctacact tgccacgcgc ctagcgccc ctcctttcgc tttcttccct tcctttctcg
121 ccacgttcgc cggctttccc cgtcaagctc taaatcgggg gctcccttta gggttccgat
181 ttagtgcttt acggcaacct gaccccaaaa aacttgatta gggatgatgt tcacgtagt
241 ggccatcgcc ctgatagacg gtttttcgcc ctttgacgtt ggagtccacg tctttaata
301 gtggactcct gttccaacct ggaacaacac tcaaccctat ctcggtctat tcttttgatt
361 tataagggat tttgcccatt tcggcctatt ggttaaaaaa tgagctgatt taacaaaaa
421 ttaacgcgaa ttttaacaaa atattaacgc ttacaatttc catcgccat taaggctcg
481 caactgttgg gaaggcgat cgggtcgggc ctcttcgcta ttacgccagc tggcgaaagg
541 gggatgtgct gcaaggcgat taagttgggt aacgccaggy ttttccagat cacgacgttg
601 taaaacgcag gccagtgagc gcgcgtaata cgactcacta tagggcgaat tggagctcca
661 cgcggtggc gcccgcctca gaactagtgg atccccggg ctgcaggaat tatccccgac
721 cggctctagc ttcataattg atatagtttt gtaaatgaca tgacagtttt ttattttttt
781 tttatccata attacgaatt gaacaactct acacacatat taattgcaag aacttatgct
841 acataatatg gaggaagtg gatgcatcat cccatccaag aagacatacg aatttattg
901 tggcatcgca atcgccgaa ccagcaaaag atgatcatag tagtcatatg agccgtacgt
961 gccgatcat ttcgtgcaga acctcagag acgttggtcg acagattgat agaactgtg
1021 tagttagtc atccacaaa gttgtccatt agggacaaa gaaaaaacg gcttaacta
1081 gaaatttgtg taccagtag gaatcgcgta ttcggccgat agaggctcct ccgtaagtat
1141 tcccagcgt tagagagcaa cgctcgtgcg tccaaaaatc cgctaaatat caaacggctt
1201 tcacagtttc gaaagatata aagctcgaga tggtagagca gggcggagg gataacatgg
1261 ccatcatcaa ggagttcatg cgctcaagg tgcacatgga gggctccgtg aacggccacg
1321 agttcgagat cagggcggag ggcgagggcc gccctacga gggcaccag accgcaagc
1381 tgaaggtgac caagggtggc cccctgccct tcgctggga catcctgtcc cctcagttca
1441 tgtacggctc caaggcctac gtgaagcacc cgcgcgacat ccccgactac ttgaagctgt
1501 ccttccccga gggctcaag tgggagcgcg tgatgaactt caggacggc ggcgtggtga
1561 ccgtgaccca ggactcctcc ctgcaggacg gcgagttcat ctacaaggtg aagctgcgg
1621 gcaccaactt cccctccgac ggcccggtaa tgcagaagaa gaccatgggc tgggaggcct
1681 cctccgagcg gatgtacccc gaggacggcg cctgaaggg cgagatcaag cagaggctga
1741 agctgaagga cggcggccac tacgacgctg aggtcaagac cacctacaag gccaaagaagc
1801 ccgtgcagct gcccggcgcc tacaacgtca acatcaagtt ggacatcacc tcccacaacg
1861 aggactacac catcgtggaa cagtacgaac gcgcgaggg cgcactcc accggcgca

```

1921 tggacgagct gtacaagtaa ttaattaact aaagctaaat tgaacaccct aaattatgtg  
1981 taaaatttct gctaagcagc ggtgttgggg tcaataaaaa tgttttttct cactctatct  
2041 gcttcgtttt gtttgccatt tctcagtttt tgctctgtac tcatgtgtaa gattatgtg  
2101 agtgatggga agtagctccg aagttttctg gaatcgtttc cggatagtag gttcggatct  
2161 agtttccgga atcggctccg gaattggttc cggaaattgat tccgggatca gaattggctc  
2221 aaaattctca tggagattcc cagagtgtat tcgcttctga aacttctgat ttaattcaag  
2281 aattgatccc cattctggag ctaattccaa ttctggagtc aattctgatt ctgttaccog  
2341 aacaaattgc gattcccagg tcaatgcccg ttccggggtg gattctgatt ccggagttgg  
2401 aatcagctcc ggaattggaa tcggtcctta aatcggggcg gccacatgtg gcccagctgc  
2461 ggggtcccgg ccgtgccctt gggctcccc ggcgcgtact ccacctacc catcaacatg  
2521 gtgcgctcct ccaagaacgt catcaaggag ttcatgcgct tcaaggtgcg catggagggc  
2581 accgtgaacg gccacgagtt cgagatcgag ggcgagggcg agggccgcc ctacgagggc  
2641 cacaacaccg tgaagctgaa ggtgaccaag ggcggcccc tgcccttcgc ctgggacatc  
2701 ctgtcccccc agttccagta cggctccaag gtgtacgtga agcaccocgc gcacatcccc  
2761 gactacaaga agctgtcctt ccccgagggc ttcaagtggg agcgcgtgat gaacttcgag  
2821 gacggcgggc tgggtgaccg gaccocaggac tcctccctgc aggacggctg ctctcatctac  
2881 aaggtgaagt tcatcgccgt gaacttcccc tccgacggcc ccgtaatgca gaagaagacc  
2941 atgggctggg aggcctccac cgagcgcctg taccocccgc acggcgtgct gaagggcgag  
3001 atccacaagg ccctgaagct gaaggacggc ggcactacc tgggtggagt caagtccatc  
3061 tacatggcca agaagcccgt gcagctgccc ggctactact acgtggactc caagctggac  
3121 atcacctccc acaacgagga ctacaccatc gtggagcagt acgagcgcac cgagggccgc  
3181 caccacctgt tctgtagcg gccgcgactc tagatcataa tcagccatc acatttgta  
3241 gaggttttac ttgctttaa aaacctcca cacctcccc tgaacctgaa acataaaatg  
3301 aatgcaattg ttgtgttaa cttgtttatt gcagcttata atggttacia ataaagcaat  
3361 agcatcaca atttcacia ttttcaactc ttttcaactc attctagttg tggtttgc  
3421 aaactcatca atgtatctta aagcttatcg atacgcgtac ggcgcgccct agcgttcata  
3481 attgatatag ttttghtaaat gacatgacag ttttttatt tttttttatc cataattacg  
3541 aattgaaaca ctctacacac atattaattg caagaactta tgctacataa tatggaggaa  
3601 agtggatgta tcattcccac caagaagaca tacgaattta tttgtggcat gcfaatcggc  
3661 cgaaccagca aaagatgac atagtagtca tatgactcgg acccgagttg gccaacgacc  
3721 cacggcgcca gtttagggcg atggtgagaa gtgcgcgtct cgttcccga gctcggcagc  
3781 actctcagac tcagagccgt acgtgccgga tcatttctgt cagaacctc agagacgttg  
3841 gtcgacagat tgatagaaac tgtgtagtta gtccattcac aaagtgttct cattagggac  
3901 aaaagaaaa aacggcttaa actagaaatt tgtgtacca gtaggatcg cgtattcggc  
3961 cgatagaggt ccttccgtaa gtattcccag cgcttagaga gcaacgctcg tgcgttcaa  
4021 aatccgctaa atatcaaacg gcttccacag tttcgaaga tatcaagctt atggtgagca  
4081 agggcgagga gctgtccacc ggggtgggtc ccatcctggt acgactggac ggcgacgtaa  
4141 acggccacaa gttcagcgtg tccggcgagg gcgagggcga tgccacctac ggcagctga  
4201 ccctgaagtt catctgcacc accggcaagc tgcccgtgcc ctggcccacc ctcgtgacca  
4261 ccctgaccta cggcgtgcag tgctcagcc gctaccocga ccacatgaag cagcagact  
4321 tcttcaagtc gcctatgccc gaaggctacg tccaggagcg caccatcttc tcaaggagc  
4381 acggcaacta caagaccocg gccgaggtga agttcagagg cgacacctg gtgaaccga  
4441 tcgagctgaa gggcatcgac ttcaaggagg acggcaacat cctggggcac aagctggagt  
4501 acaactacaa cagccacaac gtctatatca tggccgacaa gcagaagaac ggcataaagg  
4561 tgaacttcaa gatccgccac aacatcgagg acggcagcgt gcagctccc gaccactacc  
4621 agcagaacac ccccatcgcc gacggcccc tgctgctgcc cgacaaccac tactgagca  
4681 cccagtcocg cctgagcaaa gaccocacag agaagocgca tcacatggtc ctgctggagt  
4741 tcgtgaccgc cgccgggatc actctcggca tggacgagct tgacaagtaa gcttaactaa  
4801 agctaaattg aacaccctaa attatgtgta aaatttctgc taagcagcgg tgttggggtc  
4861 aataaaaatg ttttttccca ctctattcgc ttctgttttg ttgccatttc tcagttttg  
4921 ctctcgtact atgtgtaagg attagtgag tgatgggaag tagctccgaa gttttctgga  
4981 atcgtttccg gatagtaggt tcggtattag tttccggaat cggctccgga atgggttccg  
5041 gaattgatct cgggatcaga attggctcaa aattctcatg gagattccca gactgatttc  
5101 gcttctgaaa ctctgatttt aattcaagaa ttgatcccca ttctggagct aattccaatt  
5161 ctggagtcaa ttctgattct gttaccocgaa caaattgcga ttcccaggtc aatgccatt  
5221 ccgggagca ttctgattcc gtagttggaa tcagctccgg aattggaaatc ggtcctttaa  
5281 tcgggcggcg ctaggagctt atcgataccg tcgacctcga gggggggccc ggtaccagc  
5341 ttttgttccc ttttagtgagg gtttaattgc cgcttgccgt aatcatggtc atagctgtt  
5401 cctgtgtgaa attgatatcc gctcacaatt ccacacaaca tacgagccgg aagcataaag  
5461 tgtaaagcct ggggtgccta atgagtgagc taactacat taattgcgtt gcgctcactg  
5521 cccgctttcc agtcgggaaa cctgtcgtgc cagctgcatt aatgaatcgg ccacgcgcg  
5581 gggagagggc gtttgcgtat tgggcgctct tccgcttctc cgctcactga ctcgtcgcg  
5641 tcggtcgttc ggtcgcggcg agcggtatca gctcactcaa agcgggtaac acggttatcc  
5701 acagaatcag gggataacgc aggaagaac atgtgagcaa agggccagca aaaggccagg  
5761 aaccgtaaaa aggcgcggtt gctggcgttt ttccatagcc tccgcccccc tgacgagcat  
5821 caaaaaaatc cagcgtcaag tcagaggtgg cgaaaaccga caggactata aagataccag  
5881 gctgttcccc ctggaaagct cctcgtgccc tctcctggtc gcaccocgcc gcttaccgga  
5941 tacctgtccg cctttctccc ttcgggaagc gtggcgcttt ctcatagctc acgctgtagg  
6001 tatctcagtt cgggtgaggt cgttcgctcc aagctgggct gtgtgcacga acccccgtt  
6061 cagcccagcc cctgcgcctt atcccgtaac tatcgtcttg agtccaacc ggtaaagacac  
6121 gacttatcgc gactggcagc agccactggt aacaggatta ccagagcgag gtagtaggc  
6181 ggtgctacag agttcttgaa gtggtggcct aactacggct aactagaag gacagtattt  
6241 ggtatctcgc ctctcgtgaa gccagttacc ttcggaaaaa gacttggtag ctcttgatcc  
6301 ggcaaacaaa ccaccgctgg tagcgggtgg ttttttggtt gcaagcaga gattacgcg  
6361 agaaaaaaag gatctcaaga agatcctttg atcttttcta cggggctcga cgctcagtg  
6421 aacgaaaaat cacgttaagg gattttggct atgagattat caaaaaggat cttcacctag  
6481 atcctttctg accgaataaa tacctgtgac ggaagatcac ttcgcagaat aaataaatcc  
6541 tgggtccctt gttgataccg ggaagccctg ggccaacttt tggcgaatat gagacttga  
6601 tcggcagcta agaggttcca actttcacca taatgaaata agatcactac cggcgtatt  
6661 ttttgagttg toagatttt caggagctaa ggaagctaaa atggagaaaa aaatcactgg

6721 atataccacc gttgatatat cccaatggca tcgtaaagaa cattttgagg catttcagtc  
6781 agttgctcaa tgtacctata accagaccgt tcagctggat attacggcct ttttaaagac  
6841 cgtaaagaaa aataagcaca agttttatcc ggccctttatt cacattcttg cccgcctgat  
6901 gaatgctcat ccggaattac gtatggcaat gaaagacggg gagctgggta tatgggatag  
6961 tgttcaccct tgttacaccg ttttccatga gcaaactgaa acgttttcat cgctctggag  
7021 tgaataccac gacgatttcc ggcagtttct acacatata tgcgaagatg tggcgtgtta  
7081 cgggtgaaaac ctggcctatt tccctaaagg gtttattgag aatatgtttt tcgtctcagc  
7141 caatccctgg gtgagtttca ccagttttga tttaaacgtg gccaatatgg acaacttctt  
7201 cgccccggtt ttcaccatgg gcaaatatta tacgcaaggc gacaagggtc tgatgccgct  
7261 ggcgattcag gttcatcatg ccgtttgtga tggcttccat gtgggcagaa tgcttaatga  
7321 attacaacag tactgcgatg agtggcaggg cggggcgtaa tttttttaag gcagttattg  
7381 gtgcccttaa acgcctggtt gctacgcctg aataagtgat aataagcggg tgaatggcag  
7441 aaattcgaag gcaaattcga cccggtcgtc ggttcagggc agggtcgtta aatagccgct  
7501 tatgtctatt gctggtttac cggtttattg actaccgaa gcagtgtgac cgtgtgcttc  
7561 tcaaatgcct gaggccagtt tgctcaggct ctccccgtgg aggtaataat tgacgatatg  
7621 atcctttttt tctgatcaaa agtgctcatc attggaaaac gttcttcggg gcgaaaactc  
7681 tcaaggatct taccgctggt gagatccagt tcgatgtaac cactcgtgc acccaactga  
7741 tcttcagcat cttttacttt caccagcgtt tctgggtgag caaaaacagg aaggcaaaat  
7801 gccgcaaaaa agggaataag ggcgacacgg aatgttgaa tactcactact cttccttttt  
7861 caatattatt gaagcattta tcaaggggta ttgtctcatg agcggataca tatttgaatg  
7921 tatttagaaa aataaaciaa taggggttcc gcgcacattt ccccgaaaag tgccac

//

**pB\ (b2-mCherry) -attB-dsRFP-355beta2-GFP**

LOCUS pB\ (b2-mCherry) -attB-dsRFP-355beta2-GFP 7976 bp DNA circular UNA 23-MAR-2017  
DEFINITION Mars-355.  
ACCESSION urn.local...11-781tst0  
VERSION urn.local...11-781tst0  
KEYWORDS .  
SOURCE .  
ORGANISM .  
FEATURES  
rep\_origin Location/Qualifiers  
21..327  
/label="f1\_origin"  
CDS complement(471..614)  
/modified\_by="User"  
/label="lacZ\_a"  
promoter 600..616  
/label="M13\_forward20\_primer"  
promoter 626..644  
/label="T7\_promoter"  
misc\_feature join(677..>711,<5296..5321)  
/created\_by="User"  
/label="MCS"  
ligation 708..711  
/label="Ligation"  
ligation 712..715  
/label="Ligation"  
misc\_feature 716..2513  
/Source="referenceToDocument: urn:local::14s-6crwd4p"  
/label="Digestion of pUC-mCherry - Fragment 3 extraction  
(concatenated sequence 2)"  
/note="Geneious type: Concatenated sequence"  
promoter 725..1223  
/vntifkey=29  
/label="b2\promoter"  
CDS 1230..1940  
/vntifkey=4  
/label="mCherry"  
terminator 1949..2435  
/vntifkey=21  
/modified\_by="User"  
/label="b2\3'UTR"  
misc\_recomb 2458..2513  
/vntifkey=86  
/label="attB"  
ligation 2514..2517  
/label="Ligation"  
misc\_feature 2517^2518  
/Original\_Bases="A"  
/label="A"  
/note="Geneious type: Editing History Deletion"  
misc\_feature 2518..5289  
/Source="referenceToDocument: urn:local::14s-6crwd4p"  
/label="Digestion of pUC-RFP-355b2GFP - Fragment 1  
extraction (concatenated sequence 3)"  
/note="Geneious type: Concatenated sequence"  
primer\_bind 2518..2538  
/Sequence="ATGGTGCCTCCTCCAAGAAC"  
/Hairpin\_Tm="40.3"  
/Tm="63.0"  
/Self\_Dimer\_Tm="19.3"  
/%GC="57.1"  
/created\_by="primer3"  
/label="aaa"  
CDS 2518..3195  
/vntifkey=4  
/label="DsRed\ (RFP) "  
terminator 3206..3439  
/vntifkey=43  
/label="SV40"  
promoter 3469..4067  
/vntifkey=21  
/modified\_by="User"  
/label="b2promoter"  
misc\_feature 3484..3487  
/vntifkey=21  
/label="GATA"  
misc\_feature 3570..3619  
/created\_by="User"  
/label="RE 0.41"

```

misc_feature 3578..3627
              /created_by="User"
              /label="RE 0.49"
Synthetic    3630..3729
              /created_by="User"
              /label="spacer"
misc_feature 3730..3776
              /created_by="User"
              /label="RE 0.36"
misc_feature 3852..3855
              /vntifkey=21
              /label="GATA"
misc_feature 3962..3965
              /vntifkey=21
              /label="GATA"
misc_feature 4059..4062
              /vntifkey=21
              /label="GATA"
CDS          4071..>4787
              /vntifkey=4
              /modified_by="User"
              /label="eGFP"
terminator   4790..5285
              /vntifkey=21
              /modified_by="User"
              /label="b2terminator"
misc_feature <5290..5295
              /Source="referenceToDocument: urn:local:::lo-781tstz"
              /label="Annealed link-E2-F2 extraction (concatenated
              sequence 2)"
              /note="Geneious type: Concatenated sequence"
ligation     5290..5293
              /label="Ligation"
misc_feature 5294..711
              /label="Digestion of pBC-Linker-E2-F2 - Fragment 2
              (concatenated sequence 1)"
              /note="Geneious type: Concatenated sequence"
ligation     5296..5299
              /label="Ligation"
promoter     complement(5348..5367)
              /label="T3_promoter"
promoter     complement(5384..5402)
              /label="M13_reverse_primer"
misc_feature complement(5401..5423)
              /label="M13_pUC_rev_primer"
promoter     complement(5437..5466)
              /label="lac_promoter"
primer_bind  complement(5700..5723)
              /Sequence="CCTGCGTTATCCCCTGATTCGTG"
              /Hairpin_Tm="32.2"
              /Tm="63.3"
              /Self_Dimer_Tm="None"
              /%GC="54.2"
              /created_by="primer3"
              /label="Bluescript_r2"
primer_bind  5733..5754
              /Sequence="GTGAGCAAAAGGCCAGCAAAAG"
              /Hairpin_Tm="46.5"
              /Tm="61.4"
              /Self_Dimer_Tm="11.3"
              /%GC="50.0"
              /created_by="primer3"
              /Extension="TTAATTAA"
              /modified_by="User"
              /label="pBC_Pac"
primer_bind  5754..5774
              /Sequence="GGCCAGGAACCGTAAAAAGGC"
              /Hairpin_Tm="None"
              /Tm="62.1"
              /Self_Dimer_Tm="0.9"
              /%GC="57.1"
              /created_by="primer3"
              /Extension="TTAATTAA"
              /modified_by="User"
              /label="BluescriptPacI_f"
rep_origin   complement(5775..6394)
              /label="pBR322_origin"
gene         6701..7360
              /gene="CAT/CamR"
              /label="CAT/CamR"

```

CDS 6701..7360  
/translacion="MEKKITGYTTVDISQWHRKEHFQVSAQCTYNQTVQLDITAF  
LKTVKKNKHKFYPAFIHILARLMNAHPELRMAMKDGELVIWDSVHPCYTVFHEQTEF  
SSLWSEYHDDFRQFLHIYSQDVACYGENLAYFPKGF IENMFFVSANPWSVSTSFDLNV  
ANMDFAPVFTMGKYTQGDVKVLMPLAIQVHHAUCDGFHVGRMLNELQQYCYDEWQGG  
A\*"  
/label="ORF frame 1"  
gene complement(7647..7847)  
/gene="Ampicillin (860 - 660)"  
/translacion="MEKKITGYTTVDISQWHRKEHFQVSAQCTYNQTVQLDITAF  
LKTVKKNKHKFYPAFIHILARLMNAHPELRMAMKDGELVIWDSVHPCYTVFHEQTEF  
SSLWSEYHDDFRQFLHIYSQDVACYGENLAYFPKGF IENMFFVSANPWSVSTSFDLNV  
ANMDFAPVFTMGKYTQGDVKVLMPLAIQVHHAUCDGFHVGRMLNELQQYCYDEWQGG  
A\*"  
/label="Ampicillin (860 - 660)"  
promoter complement(7890..7918)  
/translacion="MEKKITGYTTVDISQWHRKEHFQVSAQCTYNQTVQLDITAF  
LKTVKKNKHKFYPAFIHILARLMNAHPELRMAMKDGELVIWDSVHPCYTVFHEQTEF  
SSLWSEYHDDFRQFLHIYSQDVACYGENLAYFPKGF IENMFFVSANPWSVSTSFDLNV  
ANMDFAPVFTMGKYTQGDVKVLMPLAIQVHHAUCDGFHVGRMLNELQQYCYDEWQGG  
A\*"  
/label="AmpR\_promoter"

ORIGIN

```

1 ctgacgcgcc ctgtagcggc gcattaagcg cggcgggtgt ggtggttacg cgcagcgtga
61 ccgctacact tggcagcgcc ctagcgccc ctcctttcgc tttcttccct tcctttctcg
121 ccacgttcgc ggcctttccc cgtaagctc taaatcgggg gctcccttta gggttccgat
181 ttagtgcttt acggcacctc gaccccaaaa aacttgatta ggtgatggt tcacgtagtg
241 ggccatcgcc ctgatagacg gtttttcgcc ctttgacgtt ggagtcacg tcttttaata
301 gtggactctt gttccaaact ggaacaacac tcaaccctat ctcggtctat tcttttgatt
361 tataagggat tttgcccgat tcggcctatt ggttaaaaaa tgagctgatt taacaaaaat
421 ttaacgcaa ttttaacaaa atattaacgc ttacaatttc cattcgccat tcaggctcgc
481 caactgttg gaaggcgat cgggtcgggc ctcttcgcta ttacgccagc tggcgaaagg
541 gggatgtgct gcaaggcgat taagtgggt aacgccaggg ttttccagc cagcagctg
601 taaaacgacg gccagtgagc gcgcgtaata cgactcacta tagggcgaat tggagctcca
661 ccgcggtggc ggcccctcta gaactagtgg atccccggg ctgcaggaat tatccccgac
721 cgtctagcg ttcataattg atatatgttt gtaaatgaca tgacagtttt ttatTTTTTT
781 tttatccata attcagaatt gaacaactct acacacatat taattgcaag aacttatgct
841 acataatag gaggaagtg gatgcatcat cccatccaag aagacatacg aatttatttg
901 tggcatcgca atcgccgcaa ccagcaaaaag atgatcatag tagtcatatg agccgtacgt
961 gccgcatcat ttcgtgcaga accttcagag acgttggtcg acagattgat agaactgtg
1021 tagttagtcc attcacaagg ttgttccatt agggacaaaa gaaaaaaacg gcttaaacata
1081 gaaattttgt taccagtag gaatcgcgta ttcggccgat agaggtcctt cagtaagtat
1141 tcccagcgct tagagagcaa cgctcgtgcg ttcaaaaatc cgctaaatat caaacggctt
1201 tcacagtttc gaaagatatac aagctcagaa tggtgagcaa gggcgaggag gataacatgg
1261 ccatcatcaa gaggttcatg cgcttcaagg tgcacatgga gggctccgtg aacggccacg
1321 agttcgagat cgaggcgag ggcgagggcc gccctacga gggcacccag accgccaagc
1381 tgaaggtgac caagggtggc cccctgccct tcgctggga cctcctgtcc cctcagttca
1441 tgtacggctc caaggcctac gtgaagcacc cgcgcgacat ccccgactac ttgaagctgt
1501 ccttccccga gggcttcaag tgggagcgcg tgatgaactt cgaggacggc ggcgtggtga
1561 ccgtgaccca ggactcctcc ctgcaggacg gcgagttcat ctacaagtg aagctgcgcg
1621 gcaccaactt cccctccgac ggccccgtaa tgcagaagaa gaccatgggc tgggaggcct
1681 cctccgagcg gatgtacccc gaggacggcg cctcgaagg cgagatcaag cagaggctga
1741 agctgaagga cggcgccacc tacgacgctg aggtcaagac cacctacaag gccagaagc
1801 ccgtgacgct gcccgcgccc tacaacgtca acatcaagtt ggacatcacc tcccacaacg
1861 aggactacac catcgtggaa cagtaacgaac gcgcccaggg ccgcccactc accggcggca
1921 tggacgagct gtacaagtaa ttaattaaact aaaagctaaat tgaacacct aaattatgtg
1981 taaaatttct gctaagcagc ggtgttgggg tcaataaaaa tgttttttct cactctattc
2041 gcttctgttt tgttgccatt tctcagtttt tgcttcgtac tcatgtgtaa ggattagtgc
2101 agtgtaggga agtagctccg aagttttctg gaatcgtttc cggatagtag gttcggattt
2161 agtttccgga atcggctccg gaattggttc cggaaattgat tccgggatca gaattggctc
2221 aaaattctca tggagattcc cagagtgatt tcgcttctga aacttcgtat ttaattcaag
2281 aattgatccc cattctggag ctaattccaa ttctggagtc aattctgatt ctgttaccg
2341 aacaaattgc gattccagc tcaatgccc ttccggggtn gattotgatt ccggagttgg
2401 aatcagctcc ggaattggaa tcggtcctta aatcggggcg gccacatgtg gccagctgc
2461 gggtgccagc gcgtgccctt gggctcccc ggcgcgtaact ccacctcacc catcaacatg
2521 tgcgctctct ccaagaacgt catcaaggag ttcattgcgt tcaaggtgcg catggagggc
2581 accgtgaacg gccacgagtt cgagatcgag ggcgaggggc agggccgccc ctacgagggc
2641 cacaacaccg tgaagctgaa ggtgaccaag ggcggcccc tgccttcgc ctgggacatc
2701 ctgtcccccc agttccagta cggctccaag gtgtactgta agcaccocgc cgacatcccc
2761 gactacaaga agtctgctct ccccaggggc ttcaagtggg agcgcgtgat gaacttcgag
2821 gacgagggcg tggtagccgt gaccagggac tctctcctgc gaggcggctg ctcatctac
2881 aagggtgaag tcatcggcgt gaacttcccc tccgacggcc ccgtaatgca gaagaagacc
2941 atgggctggg aggcctccac cgagcgccty taccocccgc acggcgtgct gaaggcgag
3001 atccacaagg cctgaagct gaagacggc ggcactacc tgggtgagtt caagtccatc
3061 tacatggcca aagaagccgt gcagctgccc ggtactact acgtggactc caagctggac
3121 atcacctccc acaacgagga ctacaccatc gtggagcagt acgagcgac cgagggccgc
3181 caccacctgt tctgtagcgc gccgcgactc tagatcataa tcagccatc cacatttcta
3241 gaggttttac ttgctttaa aaacctccca cacctcccc tgaactgaa acataaaatg
3301 aatgcaattg ttggtgttaa cttgtttatt gcagcttata atggttacia ataaagcaat
3361 agcatcacia atttcacaaa taaagcattt ttttctactg attctagttg tggtttctcc

```



3421 aaactcatca atgtatotta aagcttatcg atacgcgtac ggcgcgcct acggttcata  
3481 attgatatag ttttgaatat gacatgacag ttttttattt tttttttatc cataattacg  
3541 aattgaacaa ctctacacac atattgaattg caagaactta tgctacataa tatggaggaa  
3601 agtggatgca tcatcccac caagaagacg actcggaccg gagttggcca acgaccacg  
3661 ggcggagttt gggcggatgg tgagaagtgc gcgtctcgtt ccccgagctc gccagcactc  
3721 tcagactcaa tacgaattta tttgtggcat cgcaatcggc cgaaccagca aaagatgatc  
3781 atagtagtca tatgagccgt acgtgcccga tcatttctgt cagaaccttc agagacgttg  
3841 gtcgacagat tgatagaaac tgtgtagtta gtccattcac aaagtgttcc cattagggac  
3901 aaaagaaaaa aacggcttaa actagaaaatt tgtgtacca gttagaatcg cgtattcggc  
3961 cgatagaggt ccttccgtaa gtattcccag cgcttagaga gcaacgctcg tgcgttccaa  
4021 aatccgctaa atatcaaacg gctttcacag tttcgaaga tatcaagctt atggtgagca  
4081 agggcgagga gctgttcacc ggggtgggtgc ccatcctggt cgagctggac ggcgacgtaa  
4141 acggccacaa gttcagcgtg tccggcgagg gcgagggcga tgccacctac ggcgaagtga  
4201 ccctgaagtt catctgcacc accggcaagc tgcccgtgcc ctggcccacc cctctgacca  
4261 ccctgacctc cgccgtgcag tgcctcagcc gctaccccga ccacatgaag cagcacgact  
4321 tcttcaagtc cgccatgccc gaaggtacg tccaggagcg caccatcttc ttcaggacg  
4381 acggcaacta caagaccgcg gccgaggtga agttcggagg cgacaccctg gtgaaccgca  
4441 tcgagctgaa gggcatcgac ttcaaaggag acggcaacat cctggggcac aagctggagt  
4501 acaactacaa cagccacaac gtctatatca tggccgacaa gcagaagaac ggcatacaag  
4561 tgaacttcaa gatccgccac aacatcgagg acggcagcgt gcagctcgcc gaccactacc  
4621 agcagaacac ccccatcggc gacggccccg tgctgctgcc cgacaaccac tacctgagca  
4681 cccctgcccg cctgagcaaa gaccccaacg agaagcgcga tcacatggtc ctctggagt  
4741 tcgtgaccgc cgccgggatc actctcggca tggacgagct gtacaagtaa gcttaactaa  
4801 agctaaattg aacaccctaa atattgtgta aaatttctgc taagcagcgg tgtggggtc  
4861 aataaaaatg tttttttcca ctctattcgc ttcgthtttg ttgcaatttc tcagthtttg  
4921 cttcgtactc atgtgtaagg attagtgacg tgatgggaag tagtccgaa gthttctgga  
4981 atcgtttccg gatagtaggt tcggatttag tttccggaat cggctccgga atggttccg  
5041 gaattgatcc cggtatcaga atggctcaa aattctcatg gagattccca gattgatttc  
5101 gcttctgaaa cttcgtattt aattcaagaa ttgatcccca tctggagct aattccaatt  
5161 ctggagtcaa ttctgattct gttaccgaa caaattgcga tcccaggtc aatgccatt  
5221 ccggggacga ttctgattcc ggagttggaa tcagctccgg aattggaatc ggtccttaa  
5281 tcggggcgcg ctaggagctt atcgataccg tcgacctcga gggggggccc ggtaccacg  
5341 ttttgttccc tttagtggg gttattgagc cgcttggcgt aatcatggtc atagctgtht  
5401 cctgtgtgaa attgttatcc gctcacaatt ccacacaaca tacgagccgg aagcataaag  
5461 tgtaaaagcct ggggtgccta atgagtgagc taactcacat taattgcgtt gcgctcactg  
5521 cccgctttcc agtcgggaaa cctgtcgtgc cagctgcatt aatgaatcgg ccaacgcgcg  
5581 gggagagggc gtttgcgtat tggcgctctc tccgcttcc cgtcactga cctcgtgcg  
5641 tcggctgctc ggctgcggcg agcggtatca gctcactcaa aggcggtaat acggttatcc  
5701 acagaatcag gggataaacg aggaagaac atgtgagcaa aaggccagca aaaggccagg  
5761 aaccgtaaaa agcccgctt tccataggc tcagaggtgg cgaaccgca caggactata  
5821 cacaaaaatc gacgctcaag tcagaggtgg cgaaccgca caggactata aagataccag  
5881 cggtttcccc ctggaagctc cctcgtgcgc tctcctgttc cgacctgcc gcttaccgga  
5941 tacctgtccg ctttctccc ttcgggaagc gtggcgcttt ctcatagctc acgctgtagg  
6001 tatctcagtt cgggtaggtt cgttccgctc aagctgggct gtgtgacga acccccgtt  
6061 cagcccgacc gctgcgctt atccggtaac tatcgtcttg agtccaacc ggaagacac  
6121 gacttatcgc cactggcagc agccactggt aacaggatta gcagagcgag gtatgtaggc  
6181 ggtgctacag agttcttgaa gtggtggcct aactacggct aactagaag gacagtattt  
6241 ggtatctgcy ctctgctgaa gccagttacc ttcggaaaaa gatttgtag ctcttgatcc  
6301 ggcaaaaaaa ccaccgctgg tagcgggtgt tttttgttt gcaagcagca gattacgcgc  
6361 agaaaaaaag gatctcaaga agatcctttg atcttttcta cggggtctga cgtcagtg  
6421 aacgaaaaat caccgtaagg gattttggtc atgagattat caaaaaggat cttcacctag  
6481 atccttttcg accgaataaa tacctgtgac ggaagatcac ttcgcagaat aaataaatcc  
6541 tgggtgctcc gttgataccg ggaagccctg ggccaacttt tggcgaata gagacgttga  
6601 tcggcacgta agaggttcca actttcaacca taatgaaata agatcactac cggcgctatt  
6661 ttttgagttg tcgagatttt caggagctaa ggaagctaaa atggagaaa aatcactgg  
6721 atataccacc gttgatatat cccaatggca tcgtaaaagaa cttttgagg catthcagtc  
6781 agttgctcaa tgtacctata accagaccgt tcagctggat attaogcct ttttaaagac  
6841 cgtaaaagaaa aataagcaca agttttatcc ggcctttat cacattcttg cccgcctgat  
6901 gaatgctcat ccggaattac gtatggcaat gaaagacggt gagctggtga tatgggatag  
6961 tgttaccctc tgttacaccg ttttccatga gcaactgaa acgthttcat cgtctggag  
7021 tgaataccac gacgatttcc ggcagtttct acacatata tcgcaagatg tggcgtgta  
7081 cgggtgaaaac ctggcctatt tccctaaaag gthttattg aatatgtttt tcgtctcagc  
7141 caatccctgg gtgagtttca ccagthttga tttaaactg gccaatatg acaacttctt  
7201 cgccccgctt ttcaccatgg gcaaatatta tacgcaagcg gacaaggtgc tgatgcccgt  
7261 ggcgattcag gttcatcoat cgtttgtgta tggcttccat gtcggcagaa tgctaatga  
7321 attacaacag tactgcgatg agtggcaggg cggggcgtaa ttttttaag gcagttattg  
7381 gtgcccttaa actcctgggtt gctacgcctg aataagtgat aataagcga tgatggcag  
7441 aaattcgaaa gcaaatcga cccggtcgtc ggttcaggcg aggtcgtta aatagccgct  
7501 tatgtctatt gctggtttac cggthttatt actaccgaa gcagtgtag cgtgtgcttc  
7561 tcaaatgcct gaggccagtt tgctcaggct cccccgtgg aggtaataat tgacgatag  
7621 atcctthttt ttgatcaaaa agtgctcatc attgaaaaac gthtctcgg gcgaaaaactc  
7681 tcaaggatct taccgctggt gagatccagt tcgatgtaac cactcgtgc acccaactga  
7741 tcttccagct cthttacttt caccagcgtt tctgggtgag caaaaacagg aaggcaaat  
7801 gccgcaaaaa aggaataaag ggcgacacgg aaatgthgaa tactcatac cthctthtt  
7861 caatattatt ggaacattta tcaaggthta tthtctcatg acgggataca tthttgattg  
7921 tatttagaaa aataaaciaa tagggthtcc gcgcacatt cccgaaaaag tgccc

//

**pB\ (b2-mCherry)-attB-dsRFP-WTbeta2-GFP\_v2**

```

LOCUS      pB\ (b2-mCherry)-attB-dsRFP-WTbeta2-GFP_v2      7876 bp    DNA    circular UNA 17-AUG-2016
DEFINITION Extra A removed.
ACCESSION  urn.local...13-781tst1
VERSION    urn.local...13-781tst1
KEYWORDS   .
SOURCE     .
ORGANISM   .
FEATURES   Location/Qualifiers
     misc_feature      1..>711
                     /Source="referenceToDocument: urn:local::dh-656isi9"
                     /label="Digestion of pBC-Linker - Fragment 2 extraction - Digestion of pBC KS(-) (modified) (concatenated sequence 1) (concatenated sequence 1)"
                     /note="Geneious type: Concatenated sequence"
     rep_origin        21..327
                     /label="f1_origin"
     CDS                complement(471..614)
                     /modified_by="User"
                     /label="lacZ_a"
     promoter           600..616
                     /label="M13_forward20_primer"
     promoter           626..644
                     /label="T7_promoter"
     misc_feature        join(677..>711,<5196..5221)
                     /created_by="User"
                     /label="MCS"
     misc_feature        711^712
                     /Original_Bases="CGAT"
                     /label="CGAT"
                     /note="Geneious type: Editing History Deletion"
     ligation           712..715
                     /label="Ligation"
     promoter           725..1223
                     /vntifkey=29
                     /label="b2\promoter"
     CDS                1230..1940
                     /vntifkey=4
                     /label="mCherry"
     misc_feature        1949..2435
                     /vntifkey=21
                     /label="b2\3'UTR"
     misc_recomb         2458..2513
                     /vntifkey=86
                     /label="attB"
     ligation           2514..2517
                     /label="Ligation"
     misc_feature        2517^2518
                     /Original_Bases="A"
                     /label="A"
                     /note="Geneious type: Editing History Deletion"
     CDS                2518..3195
                     /vntifkey=4
                     /label="DsRed\ (RFP) "
     terminator          3206..3439
                     /vntifkey=43
                     /label="SV40"
     promoter           3469..3967
                     /vntifkey=21
                     /modified_by="User"
                     /label="b2promoter"
     misc_feature        3570..3619
                     /created_by="User"
                     /label="RE 0.41"
     misc_feature        3578..3627
                     /created_by="User"
                     /label="RE 0.49"
     misc_feature        3627..3676
                     /created_by="User"
                     /label="RE 0.36"
     CDS                3971..>4687
                     /vntifkey=4
                     /modified_by="User"
                     /label="eGFP"
     terminator          4690..5185
                     /vntifkey=21
                     /modified_by="User"
                     /label="b2terminator"

```

```

misc_feature <5190..5195
/Source="referenceToDocument: urn:local::1s-781tsu6"
/label="Linker E-F (concatenated sequence 2)"
/note="Geneious type: Concatenated sequence"
ligation 5190..5193
/label="Ligation"
misc_feature 5196^5197
/Original_Bases="TCAA"
/label="TCAA"
/note="Geneious type: Editing History Deletion"
promoter complement(5248..5267)
/label="T3_promoter"
promoter complement(5284..5302)
/label="M13_reverse_primer"
misc_feature complement(5301..5323)
/label="M13_pUC_rev_primer"
promoter complement(5337..5366)
/label="lac_promoter"
rep_origin complement(5675..6294)
/label="pBR322_origin"
gene 6601..7260
/label="CAT/CamR"
/label="CAT/CamR"
CDS 6601..7260
/translation="MEKKITGYTTVDISQWHRKEHFQVSAQCTYNQTVQLDITAF
LKTVKKNKHKFYPAFIHILARLMNAHPELRMAMKDGELVIWDSVHPCYTVFHEQTETFF
SSLWSEYHDDFRQFLHIYSQDVACYGENLAYFPKGF IENMFFVSANPWVSFTSFDLNV
ANMDFNFAPVFTMGKYITQGDKVLMLPLAIQVHHAUCDGFHVGRMLNELQQYCDEWQGG
A*"
/label="ORF frame 1"
gene complement(7547..7747)
/label="Ampicillin (860 - 660)"
/translation="MEKKITGYTTVDISQWHRKEHFQVSAQCTYNQTVQLDITAF
LKTVKKNKHKFYPAFIHILARLMNAHPELRMAMKDGELVIWDSVHPCYTVFHEQTETFF
SSLWSEYHDDFRQFLHIYSQDVACYGENLAYFPKGF IENMFFVSANPWVSFTSFDLNV
ANMDFNFAPVFTMGKYITQGDKVLMLPLAIQVHHAUCDGFHVGRMLNELQQYCDEWQGG
A*"
/label="Ampicillin (860 - 660)"
promoter complement(7790..7818)
/translation="MEKKITGYTTVDISQWHRKEHFQVSAQCTYNQTVQLDITAF
LKTVKKNKHKFYPAFIHILARLMNAHPELRMAMKDGELVIWDSVHPCYTVFHEQTETFF
SSLWSEYHDDFRQFLHIYSQDVACYGENLAYFPKGF IENMFFVSANPWVSFTSFDLNV
ANMDFNFAPVFTMGKYITQGDKVLMLPLAIQVHHAUCDGFHVGRMLNELQQYCDEWQGG
A*"
/label="AmpR_promoter"

```

ORIGIN

```

1 ctgacgcgcc ctgtagcggc gcattaagcg cggcgggtgt ggtggttacg cgcagcgtga
61 ccgctacact tgccagcgcc ctagcgccc ctcctttcgc tttcttccct tcctttctcg
121 ccacgttcgc cggttttccc cgtcaagctc taaatcgggg gctcccctta ggttccgat
181 ttagtctttt acggcaacct gaccctcaaa aacttgatta ggtgatggt tcacgtagt
241 ggccatcgcc ctgatagacg gtttttcgcc ctttgacgtt ggagtccacg ttctttaata
301 gtggactctt gttccaacct ggaacaacac tcaacctat ctcggtctat tcttttgatt
361 tataagggat tttgccgatt tcggcctatt ggttaaaaaa tgagctgatt taacaaaaat
421 ttaacgcgaa ttttaacaaa atattaacgc ttacaatttc cattcgccat tcaggctcgc
481 caactgttgg gaaggcgcg ataggcgcgc ctcttcgcta ttacgccagc tggcgaagg
541 gggatgtgct caaggcgcg taagtgggtt aacgccaggg ttttccagc cagcagctt
601 taaaacgacg gccagtgagc gcgcgtaata cgactcacta tagggcgaat tggagctcca
661 ccgcggtggc ggccgctcta gaactagtg atccccggg ctgcaggaat tatccccgac
721 cggctcagcg ttcataattg atatagtttt gtaaatgaca tgacagttt ttattttttt
781 tttatccata attacgaatt gaacaactct acacacatat taattgcaag aacttatgct
841 acataatatg gaggaagtg gatgcatcat cccatccaag aagacatac aatattattg
901 tggcatcgca atcggccgaa ccagcaaaa atgatcatag tagtcatatg agccgtacgt
961 gccggtatcat ttcgtgcaga accttcagag acgttggtcg acagattgat agaactgtg
1021 tagttagtcc attcacaaa ttgttccatt agggacaaaa gaaaaaacg gcttaacta
1081 gaaatttggt taccagtag gaatcgcgta ttccgcccag agaggctcct ccgtaagt
1141 tcccagcgct tagagagcaa cgctcgtgcg ttccaaaatc cgctaaata caaacggctt
1201 tcacagtttc gaaagatatc aagctcgaga tggtagcaga gggcgaggag gataacatgg
1261 ccatcatcaa ggagttcatg cgctcaagg tgcacatgga gggctccgtg aacggccacg
1321 agttcgagat cgaggcgcag ggcgagggcc gccctacga gggcaccacg accgccaagc
1381 tgaaggtgac caagggtggc cccctgccct tcgctggga catcctgtcc cctcagttca
1441 tgtacggctc caaggcctac gtgaagcacc ccgcccacat ccccgactac ttgaagctgt
1501 ccttccccga gggcttcaag tgggagcgcg tgatgaactt cgaggacggc ggcgtggtga
1561 ccgtagccca ggactcctcc ctgcaggacg gcgagttcat ctacaaggtg aagctgcgcg
1621 gcaccaactt cccctccgag ggcccgcgtaa tgcagaagaa gaccatggg tgggaggcct
1681 cctccgagcg gatgtacccc gaggacggcg cctgaaggg cgagatcaag cagaggctga
1741 agctgaagga cggcgccac tacgacgctg aggtcaagac cactacaag gccagaagc
1801 ccgtgcagct gccggcgccc tacaacgtca acatcaagtt ggacatcacc tcccacaacg
1861 aggactacac catcgtggaa cagtacgaac gcgcccagg cgcactcc accggcgga
1921 tggacgagct gtacaagtaa ttaattaact aaagctaaat tgaacacct aaattatgtg
1981 taaaatttct gctaagcagc ggtgttggg tcaataaaaa tgttttttct cactctatc

```

2041 gcttcgtttt tgttgccatt tctcagtttt tgcttcgtac tcatgtgtaa ggattagtgc  
2101 agtgatggga agtagctccg aagttttctg gaatcgtttc cggatagtag gttcggatt  
2161 agtttccgga atcgctccg gaattggttc cggaaattgat tccgggatca gaattggctc  
2221 aaaattctca tggagattcc cagagtgatt tcgcttctga aacttcgtat ttaattcaag  
2281 aattgatccc cattctggag ctaattccaa ttctggagtc aattctgatt ctgttaccog  
2341 aacaaattgc gattcccagg tcaatgcccg ttccggggtn gattctgatt ccggagttgg  
2401 aatcagctcc ggaattggaa tcggtcctta aatcggggcg gccacatgtg gccagctgc  
2461 ggggtgccagg gogtgcocct gggctccccg ggcgcgtact ccacctcacc catcaacatg  
2521 gtgcgctcct ccaagaacgt catcaaggag ttcatgctc tcaaggtcgc catggagggc  
2581 accgtgaacg gccacgagtt cgagatcgag ggcgagggcg agggocgcc ctacgagggc  
2641 cacaacaccg tgaagctgaa ggtgaccaag ggcggcccc tgcccttcgc ctgggacatc  
2701 ctgtcccccc agttccagta cggctccaag gtgtacgtga agcaccocgc cgacatcccc  
2761 gactacaaga agctgtcctt ccccaggggc ttcaagtggg agcgcgtgat gaacttcgag  
2821 gacggcggcg tggtagccgt gaccocaggac tcctccctgc agaacggctg ttcatctac  
2881 aaggtgaagt tcatcgccgt gaacttcccc tccgacggcc ccgtaatgca gaagaagacc  
2941 atgggctggg aggcctccac cgagcgctg taccocccgc acggcgtgct gaagggcgag  
3001 atccacaagg ccctgaagct gaaggacggc ggccactacc tgggtggagt caagtccatc  
3061 tacatggcca agaagcccgt gcagctgccc ggtactact acgtggactc caagctggac  
3121 atcacctccc acaacgagga ctacaccatc gtggagcagt acgagcgcac cgagggccgc  
3181 caccacctgt tcctgtagcg gccgcgactc tagatcataa tcagccatcac cacatttcta  
3241 gaggttttac ttgctttaa aaacctccca cacctcccc tgaacctgaa acataaaatg  
3301 aatgcaattg ttggtttaa cttgtttatt gcagcttata atggttacia ataaagcaat  
3361 agcatcacia atttcacaaa taaagcattt ttttactgc attctagtgt tggtttctcc  
3421 aaactcatca atgtatctta aagcttatcg atacgcgtac ggcgcgccct agcgttcata  
3481 attgatatac ttttataaat gacatgacag ttttttatt tttttttatc cataattacg  
3541 aattgaacaa ctctacacac atattaattg caagaactta tgctacataa tatggaggaa  
3601 agtggatgca tcatcccatc caagaagaca tacgaattta tttgtggcat cgcaatcggc  
3661 cgaaccagca aaagatgatc atagtatgca tatgagccgt acgtgccgga tcatttctgtg  
3721 cagaaccttc agagacgttg tgcgacagat tgatagaaac tgtgtagtta gtcatttcc  
3781 aaagttgttc cattaggggac aaaagaaaaa aacggcttaa actagaaatt tgtgtacca  
3841 gtaggaatcg cgtattcggc cgatagaggt ccttccgtaa gtattcccag cgcttagaga  
3901 gcaacgctcg tgcgttccaa aatccgctaa atatacaaac gctttcacag tttcgaaga  
3961 tatcaagctt atggtgagca agggcgagga gctgttcacc ggggtggtgc ccatcctggt  
4021 cgagctggac ggcgacgtaa acggccacaa gttcagcgtg tccggcgagg gcgaggcgga  
4081 tgccacctac ggcaagctga ccctgaagtt catctgcacc accggcaagc tgcccgtgcc  
4141 ctggcccacc ctgctgacca ccctgacctc cggcgtgcag tgcttcagcc gctaccccga  
4201 ccacatgaag cagcacgact tcttcaagtc cggccatgcc gaaggctacg tccaggagcg  
4261 caccatcttc ttcaaggacg acggcaacta caagaccgc gccgaggtga agttcgaggg  
4321 cgacaccctg gtgaaccgca tcgagctgaa gggcatcgac ttcaaggagg acggcaacat  
4381 cctggggcgc aagctggagt acaactacia cagccacaac gtctatatca tggccgacaa  
4441 gcagaagaac agctcaaggt tgaactcaa gatccggcac acacatcgag acggcagcgt  
4501 cgagctcgcc gaccactacc agcagaacac ccccatcggc gacggcccc tgctgctgcc  
4561 cgacaaccac tacctgagca cccagctccg cctgagcaaa gaccccaacg agaagcgcga  
4621 tcacatggtc cgtctggagt tcgtgaccgc cgccgggatc actctcgga tggacgagct  
4681 gtacaagtaa cgttaactaa agctaaattg aacaccctaa attatgtgta aaatttctgc  
4741 taagcagcgg tgttggggtc aataaaaaatg ttttttcca ctctattcgc ttcgtttttg  
4801 ttgccatttc tcagtttttg cttcgtactc atgtgtaagg attagtgcag tgatgggag  
4861 tagctccgaa gttttctgga atcgtttccg gatagtaggt ttcgtattag tttccggaat  
4921 cggctccgga attggttccg gaattgattc cgggatcaga attggctcaa aatttctatg  
4981 gagattccca gagtgatttc gcttctgaaa cttcgtattt aatcoagaa ttgatcccca  
5041 ttctggagct aattccaatt ctggagtcaa ttctgattct gttacccgaa caaattgcga  
5101 ttcccaggtc aatgccatt cggggacgca ttctgattcc ggagttgaa tcagctccgg  
5161 aattggaatc ggtccttaaa tcggggcgcgc ctaggagctt atcgataccg tcgacctcga  
5221 gggggggccc ggtaccocagc ttttgttccc tttagttagy gtttaattcg cgttggcgt  
5281 aatcatggtc atagctgttt cctgtgtgaa attgttatcc gctcacaatt ccacacaaca  
5341 tacgagccgg aagcataaag tghtaaagcct ggggtgccta atgagtagc taactcacat  
5401 taattgcggt gogctcactg cccgctttcc agtcgggaaa cctgtcgtgc cagctgcatt  
5461 aatgaatcgg ccaacgcgcg gggagaggcg gtttgcgtat tgggcgctct tccgcttct  
5521 cgctcactga ctcgctgcgc tcggtcgttc ggcgagggcg agcgggatca gctcactcaa  
5581 aggcggtaat acggttatcc acagaaatcag gggataacgc aggaaagaac atgtgagcaa  
5641 aaggccagca aaaggccagg aaccgtaaaa aggcgcgctt gctggcgttt tccataggc  
5701 tccgcccccc tgacgagcat cacaanaaatc gacgctcaag tcagaggtgg cgaacccga  
5761 caggactata aagataccag cgttttcccc ctggaagctc cctcgtgcgc tctcctgttc  
5821 cgaccctgcc gcttaccgga tacctgtccg ccttctccc ttcgggaagc gtggcgcttt  
5881 ctcatagctc acgctgtagg tatctcagtt cgtgttaggt cgttogctcc aagctggct  
5941 gtgtgcacga acccccgtt cagcccagcc gctgcgctt atccggtaac tatcgtctt  
6001 agtccaacc accccaacac cacttatcgc cactggcagc agccactggt aacaggatta  
6061 gcagagcgag gtatgtaggc ggtgctacag agttcttgaa gtggggcct aactacggct  
6121 acactagaag gacagtattt ggtatctgcy ctctgctgaa gccagttacc ttcggaaaaa  
6181 gagttgtag ctcttgatcc ggcaaaaaaa ccaccgctgg tagcgggtgt tttttgttt  
6241 gcaagcagca gattacgcgc agaaaaaaaag gatcctaaga agatoccttg atcttttcta  
6301 cggggtctga cgctcagtg aacgaaaaact cacgttaagg gattttggtc atgagattat  
6361 caaaaaaggat cttocactag atccttttctg accgaataaa tacctgtgac ggaagatcac  
6421 ttcgcagaat aaataaatcc tgggtccct gttgatccg ggaagccctg ggccaacttt  
6481 tggcgaaaaat gagacgttga tcggcacgta agaggttcca actttcacca taatgaaata  
6541 agatcactac cgggcgtatt ttttgagttg tgcgagtttt caggagctaa ggaagctaaa  
6601 atggagaaaa aaatcactgg atataccacc gttgatatat cccaatgga tcgtaagaa  
6661 catttgagct ttttaagac cgtaaaagaa agttgctcaa tgtacctata accagaccgt tcagctggat  
6721 attacggcgt ttttaagac cgtaaaagaa aataagcaca agttttatcc ggcctttatt  
6781 cacattcttg cccgcctgat gaatgctcat ccggaattac gtagggcaat gaaagacggt

6841 gagctggtga tatgggatag tgttcaccct tgttacaccg ttttocatga gaaactgaa  
6901 acgttttcat cgctctggag tgaataccac gacgatttcc ggcagtttct acacatatat  
6961 tcgcaagatg tggcgtgtta cgggtgaaaac ctggcctatt tccctaaagg gtttattgag  
7021 aatatgtttt tcgtctcagc caatccctgg gtgagtttca ccagttttga tttaaactg  
7081 gccaatatgg acaacttctt cgccccggtt ttcaccatgg gcaaatatta tacgcaaggc  
7141 gacaaggtgc tgatgccgct ggcgattcag gttcatcatg ccgtttgtga tggcttccat  
7201 gtcggcagaa tgcttaatga attacaacag tactgcgatg agtggcaggg cggggcgtaa  
7261 tttttttaag gcagttattg gtgcccttaa acgcctggtt gctacgcctg aataagtgat  
7321 aataagcgga tgaatggcag aaattcgaaa gcaaattcga cccggctcgc ggttcagggc  
7381 agggctcgta aatagccgct tatgtctatt gctggtttac cggtttattg actaccgaa  
7441 gcagtggtac cgtgtgcttc tcaaatgcct gaggccagtt tgctcaggct ctccccgtgg  
7501 aggtaataat tgacgatatg atcctttttt tctgatcaaa agtgctcatc attggaaaac  
7561 gttcttcggg gcgaaaactc tcaaggatct taccgctggt gagatccagt tcgatgtaac  
7621 ccactcgtgc acccaactga tcttcagcat cttttacttt caccagcgtt tctgggtgag  
7681 caaaaacagg aaggcaaaat gccgaaaaa agggaataag ggcgacacgg aaatggtgaa  
7741 tactcatact cttccttttt caatattatt gaagcattta tcaagggtta ttgtctcatg  
7801 agcggataca tatttgaatg tatttagaaa aataaaciaa taggggttcc gcgcacattt  
7861 ccccgaaaag tgccac

//
